1 **EFCAB9 is a pH-Dependent Ca<sup>2+</sup> Sensor that Regulates CatSper Channel Activity and**  
2 **Sperm Motility**

3  
4 Jae Yeon Hwang<sup>1</sup>, Nadja Mannowetz<sup>2</sup>, Yongdeng Zhang<sup>3</sup>, Robert A. Everley<sup>4</sup>, Steven P. Gygi<sup>4</sup>,  
5 Joerg Bewersdorf<sup>3</sup>, Polina V. Lishko<sup>2</sup>, and Jean-Ju Chung<sup>1,5,\*</sup>  
6

7 <sup>1</sup>Department of Cellular and Molecular Physiology, <sup>3</sup>Department of Cell Biology, <sup>5</sup>Department of  
8 Gynecology and Obstetrics; Yale School of Medicine; New Haven, CT, 06510; USA. <sup>2</sup>Department  
9 of Molecular and Cell Biology; University of California; Berkeley, CA, 94720; USA. <sup>4</sup>Department  
10 of Cell Biology; Harvard Medical School; Boston, MA, 02115, USA.  
11

12  
13 \*Correspondence and Lead Contact: [jean-ju.chung@yale.edu](mailto:jean-ju.chung@yale.edu)  
14

15 **Summary**

16  
17 Varying pH of luminal fluid along the female reproductive tract is a physiological cue that  
18 modulates sperm motility. CatSper is a sperm-specific, pH-sensitive calcium channel essential  
19 for hyperactivated motility and male fertility. Multi-subunit CatSper channel complexes organize  
20 linear Ca<sup>2+</sup> signaling nanodomains along the sperm tail. Here, we identify EF-hand calcium-  
21 binding domain-containing protein 9 (EFCAB9) as a dual function, cytoplasmic machine  
22 modulating the channel activity and the domain organization of CatSper. Knockout mice studies  
23 demonstrate that EFCAB9, in complex with the CatSper subunit, CATSPER $\zeta$ , is essential for pH-  
24 dependent and Ca<sup>2+</sup> sensitive activation of the CatSper channel. In the absence of EFCAB9,  
25 sperm motility and fertility is compromised and the linear arrangement of the Ca<sup>2+</sup> signaling  
26 domains is disrupted. EFCAB9 interacts directly with CATSPER $\zeta$  in a Ca<sup>2+</sup> dependent manner  
27 and dissociates at elevated pH. These observations suggest that EFCAB9 is a long-sought,  
28 intracellular, pH-dependent Ca<sup>2+</sup> sensor that triggers changes in sperm motility.  
29

30 **Keywords (up to 10 keywords)**

31 Sperm motility, male fertility, Ca<sup>2+</sup> channel, CatSper, pH sensing, Ca<sup>2+</sup> sensor, Ca<sup>2+</sup> signal  
32 transduction  
33

34 **Highlights**

- 35
- 36 • *Efcab9* encodes an evolutionarily conserved, sperm-specific EF-hand domain protein
  - 37 • *Efcab9*-deficient mice have sperm motility defects and reduced male fertility
  - 38 • EFCAB9 is a pH-tuned Ca<sup>2+</sup> sensor for flagellar CatSper Ca<sup>2+</sup> channel
  - EFCAB9 is a dual function machine in gatekeeping and domain organization of CatSper
- 39

## 40 INTRODUCTION

41  
42 Changes in sperm motility patterns (Yanagimachi, 1970; Yanagimachi, 2017), observed in the  
43 steering chemotactic movement of marine invertebrate spermatozoa (Bohmer et al., 2005; Wood  
44 et al., 2005) and triggering hyperactivated motility in mammals (Ho and Suarez, 2001; Suarez et  
45 al., 1993), require  $\text{Ca}^{2+}$  influx across the flagellar membrane. The molecular commonalities for  
46 this  $\text{Ca}^{2+}$  entry pathway into these sperm cells are the flagella-specific and  $\text{Ca}^{2+}$ -selective  
47 channel, CatSper (Carlson et al., 2003; Qi et al., 2007; Quill et al., 2003; Ren et al., 2001; Seifert  
48 et al., 2015) and its activation by intracellular alkalinization (Kirichok et al., 2006; Lishko et al.,  
49 2010; Lishko et al., 2011; Miller et al., 2016; Seifert et al., 2015; Strunker et al., 2011). This  
50 implies that an evolutionarily conserved pH- and  $\text{Ca}^{2+}$ -sensing mechanism regulates the CatSper  
51 channel.

52  
53 The CatSper channel is the most complex of all known ion channels, encoded by at least nine  
54 genes in mammals. It is comprised of pore-forming  $\alpha$  subunits (CatSper1-4) (Qi et al., 2007; Quill  
55 et al., 2003; Ren et al., 2001) and five accessory subunits (transmembrane CatSper $\beta$ ,  $\gamma$ ,  $\delta$ ,  $\epsilon$ , and  
56 cytosolic CatSper $\zeta$ ) (Chung et al., 2017; Chung et al., 2011; Liu et al., 2007; Wang et al., 2009).  
57 Male mice lacking CatSper genes (Chung et al., 2017; Chung et al., 2011; Quill et al., 2003; Ren  
58 et al., 2001), as well as humans with loss of function mutations (Avenarius et al., 2009;  
59 Hildebrand et al., 2010; Smith et al., 2013), in transmembrane subunits, are completely infertile  
60 due to lack of sperm hyperactivation. More mechanistic understanding of the regulatory  
61 mechanisms has been hampered by the inability to heterologously reconstitute the complex  
62 channel and the inseparability of phenotypes resulting from loss of each subunit in sperm cells  
63 (Chung et al., 2017; Chung et al., 2011). Thus, the molecular mechanism of this pH-dependent  
64 activation of CatSper has relied on speculation, based on amino acid properties and sequence  
65 homology of the subunits. Moreover, to date, none of the known CatSper subunits contained  
66 calcium/CaM binding motifs. This suggests that additional proteins assist complex assembly and  
67 trafficking, and/or detect changes in intracellular pH and  $\text{Ca}^{2+}$  for the CatSper channel.

68  
69 The recent identification of CatSper $\zeta$  as a unique cytoplasmic component of the mammalian  
70 CatSper channel complex has been illuminating. It was previously reported that CatSper  
71 organizes  $\text{Ca}^{2+}$  signaling nanodomains, uniquely aligned along the sperm tail as 'racing stripes'  
72 to form a network of intracellular signaling molecules (Chung et al., 2014). In contrast to other  
73 CatSper knockout models, deficiency of CatSper $\zeta$  disrupts the CatSper domains but the channel  
74 is functional and only results in CatSper $\zeta$ -null male subfertility (Chung et al., 2017; Chung et al.,  
75 2014). These studies indicate that CatSper $\zeta$  functions in the compartmentalization of  $\text{Ca}^{2+}$   
76 signaling in mammalian sperm, and thus may modulate the  $\text{Ca}^{2+}$  influx mechanism of the  
77 CatSper channel.

78  
79 Here we use comparative proteomic and genomic screens and identify EFCAB9, a sperm-  
80 specific EF-hand protein, as a new auxiliary protein of the CatSper channel that modulates  
81 channel activity regulation and domain organization. We develop an *in vivo* mouse model to  
82 examine EFCAB9 function at the molecular, cellular, biochemical, electrophysiological, and  
83 super-resolution imaging levels. We find that EFCAB9 is a pH-dependent  $\text{Ca}^{2+}$  sensor for the  
84 CatSper channel. EFCAB9-CatSper $\zeta$  forms a binary complex and interacts with the pore as a  
85 gatekeeper, activating CatSper channel responding to capacitation-associated intracellular  
86 changes. EFCAB9 interaction with CatSper $\zeta$  requires its  $\text{Ca}^{2+}$  binding to EF-hands, which are  
87 responsive to pH changes in a physiologically relevant range. Loss of EFCAB9-CatSper $\zeta$  largely

88 eliminates the pH-dependent and Ca<sup>2+</sup> sensitive activation of CatSper and alters newly resolved  
89 CatSper Ca<sup>2+</sup> signaling domains. In contrast to the recent addition of CatSper $\zeta$  to mammals, the  
90 EFCAB9 and other transmembrane CatSper subunits are evolutionarily conserved from  
91 flagellated single cell eukaryotes. These findings provide insight into evolutionarily conserved  
92 gating mechanisms for CatSper channels and reveal an adaptation for Ca<sup>2+</sup> signaling in flagella.  
93

## 94 RESULTS

### 95 **Comparative Proteomic and Genomic Screens Identify Unknown Components of CatSper** 96 **Calcium Channel Complex in Sperm**

97 Sperm hyperactivated motility requires pH-dependent activation of the CatSper flagellar Ca<sup>2+</sup>  
98 channel. The CatSper channel forms a multi-protein complex composed of at least nine subunits  
99 (CatSper1-4,  $\beta$ ,  $\gamma$ ,  $\delta$ ,  $\epsilon$ , and  $\zeta$ ) (Chung et al., 2017). Here we examine a new member of the  
100 complex and determine its functional significance.  
101

102 Our previous studies showed that other CatSper subunits were not detected in *CatSper1*- and *d*-  
103 null sperm cells despite their expression during spermatogenesis (Chung et al., 2017; Chung et  
104 al., 2011). To take advantage of this interdependence and identify new CatSper components, we  
105 performed a quantitative whole sperm proteomic screen to compare *CatSper1*-null with wild-type  
106 (wt) sperm (Figure 1A), concomitant with our previous phosphotyrosine proteome analysis  
107 (Chung et al., 2014). Using tandem mass tag (TMT) labeling and mass spectrometry analysis,  
108 we quantified 3,227 proteins from *CatSper1*-null and wt spermatozoa, which is comparable to  
109 the size of other mouse sperm proteome (Castaneda et al., 2017). To identify the most  
110 significant differences of individual protein expression in biological replicates, we combined a  
111 measure of statistical significance with the magnitude of change to plot replicate data points  
112 (Figure 1A). In the experiment run in triplicate, only 19 proteins (14 downregulated and 5  
113 upregulated significantly at  $p < 0.05$ ) were differentially expressed in *CatSper1*-null sperm by  
114 more than 2-fold (Figure 1A and Table S1), down from 73 candidate proteins (25 downregulated  
115 and 48 upregulated). This overall lack of differential protein expression between wt and  
116 *CatSper1*-null spermatozoa is particularly remarkable since our screen still identified all the nine  
117 known transmembrane and cytosolic components of the CatSper channel complex in a precise,  
118 quantitative, and reproducible manner (Figure 1A). This result validates the accuracy of the data  
119 and strongly suggests that mature *CatSper1*-null spermatozoa lack only proteins that normally  
120 form a stable complex with the CatSper channel. Thus, five additional downregulated proteins  
121 identified by our screen are strong candidates for CatSper components in spermatozoa that are  
122 unincorporated into the flagellar membrane or degraded in the absence of the CatSper channel.  
123

124 To further validate the candidates, we defined two additional criteria, based on the characteristics  
125 common to the known CatSper components: (1) be testis-specific and post-meiotically  
126 expressed, and (2) share evolutionary history with typical conservation patterns of lineage-  
127 specific gain and loss of *CatSper* genes. *Efcab9* meets both criteria of this combinatorial  
128 analyses of the transcriptome database of tissue expression (Yue et al., 2014)(Figure S1A) and  
129 comparative genomic screens (Figure S1B).  
130

### 131 **EFCAB9 Is an Intraflagellar Protein with Conserved EF-Hand Ca<sup>2+</sup> Binding Domains**

132 EFCAB9 has three conserved EF-hand Ca<sup>2+</sup> binding domains (Figure 1B). Amino acid sequence  
133 alignment of EFCAB9 to calmodulin (CaM) predicts that three conserved helix-loop-helix folding  
134

135 motifs (EF1-3) contain candidate EF-hand  $\text{Ca}^{2+}$  binding sites (Figures S2A and S2B). EF-hand  
136  $\text{Ca}^{2+}$  binding sites are the side chains of aspartic and glutamic acids located in each loop  
137 (Figures 1B and S2A-S2C). Interestingly, sequence comparison of the EF loops of EFCAB9  
138 orthologues revealed species-specific variations in EF1 and EF2 from the canonical EF loop  
139 containing an acidic residue at position 12 (Figure S2C). EFCAB9 was tightly clustered with all  
140 the other previously reported CatSper subunits as one of the proteins with the most reduced  
141 expression in *CatSper1*-null spermatozoa (Figure 1A and Table S1). We confirmed that *Efcab9* is  
142 expressed only in the testis, which contrasts with the genes encoding other EF-hand containing  
143 proteins quantified in our sperm proteomes including CaM and EFCAB1 (Figure S1C and Table  
144 S1). Interestingly, *Efcab9* transcripts are detected post-meiotically, similar to the genes encoding  
145 the CatSper pore-forming  $\alpha$ -subunits, and unlike all the other CatSper auxiliary subunits (e.g.  
146 *CatSperz*, Figure S1D) (Chung et al., 2017; Chung et al., 2011). We compared EFCAB9 protein  
147 expression and subcellular localization in wt sperm cells with those in *CatSper1*- and *CatSperd*-  
148 null spermatozoa (Figures 1C-1E) by generating a specific antibody recognizing EFCAB9  
149 (Figures S2D, S2E and S3C). EFCAB9 is localized to the principal piece of the wt mouse and  
150 human sperm tail (Figures 1E and 1F), as are other CatSper subunits, but is not detected in  
151 mouse sperm lacking the CatSper channel (Figure 1D). 3D structured illumination microscopy  
152 (SIM) imaging revealed that EFCAB9 also localizes in the characteristic four linear domains of  
153 sperm flagella (Figure 1G). From these results, we hypothesized that EFCAB9 is a functionally  
154 relevant CatSper channel component. The EF-hand is one of the major  $\text{Ca}^{2+}$ -binding regions  
155 found on many of the  $\text{Ca}^{2+}$  sensors including CaM (Clapham, 2007), and EFCAB9 is the first  
156 CatSper component with a known, conserved domain. This raises the question of whether  
157 EFCAB9 underlies  $\text{Ca}^{2+}$  sensing of the CatSper channel in regulating sperm hyperactivated  
158 motility.

### 159 160 **EFCAB9-Deficient Mice Have Reduced Male Fertility and Phenotypes Resembling Loss of** 161 **CatSper $\zeta$ Function**

162 To examine the potential role of EFCAB9 in the CatSper-mediated  $\text{Ca}^{2+}$  signaling pathway, we  
163 created *Efcab9* knockout mice by CRISPR/Cas9 genome editing (Figures 2 and S3). In our  
164 targeting strategy, gRNA was selected to introduce indels into the first exon of the *Efcab9* gene  
165 located on chromosome 11 (Figures S3A and S3B). We obtained two mutant alleles with either a  
166 5 bp (*Efcab9-5del*) or a 28 bp (*Efcab9-28del*) deletion. These two mutant lines resulted in  
167 identical phenotypes in our initial characterization of bi-allelic homozygous (null) mice, ruling out  
168 the possibility that off-target effects account for the phenotypes we observed. We used the  
169 *Efcab9-28del* mutant line as the *Efcab9*-null mouse throughout this study.

170 The resulting frame-shifted transcripts failed to generate EFCAB9 proteins, demonstrated by  
171 immunoblotting and immunocytochemistry (Figures S3C and 2G). Mutant mice lacking EFCAB9  
172 display no gross phenotypic abnormality in appearance, behavior, or survival. *Efcab9*-null  
173 females had normal mating behavior and gave birth to litters when mated with wt or mono-allelic  
174 heterozygous (het) males. However, fertility was severely impaired in *Efcab9*-null male mice  
175 (Figures 2A, 2B, and S4A), despite normal sperm morphology and epididymal sperm count  
176 (Figures 2G and S4B). The pregnancy rate of the null males was 36% when housed together  
177 with fertile females over 2 months (Figure 2A), compared to 100% for wt. The fertilization rate of  
178 *Efcab9*-null spermatozoa was also significantly reduced *in vitro* (Figure 2B). Finally, *Efcab9*-null  
179 males that sire pups tend to have smaller average litter size than *Efcab9*-het males (Figure  
180 S4A), suggesting that *Efcab9*-null males are subfertile.

181 These results prompted us to further examine the flagellar beating pattern of head-tethered  
182 spermatozoa (Figure 2C; Video S1). Incubating under capacitating conditions increased the  
183 amplitude of lateral movement, measured as the maximum angle within the midpiece ( $\alpha$ -angle)  
184 (Qi et al., 2007) and slowed the beat frequency of *Efcab9*-het sperm (Figures 2D and 2E; Video  
185 S1). In contrast, the beat frequency of *Efcab9*-null sperm cells, which is faster than *Efcab9*-het  
186 spermatozoa, did not respond to capacitating conditions. Importantly, we observed that *Efcab9*-  
187 null spermatozoa displayed rigid proximal flagella with a fixed midpiece curvature (Figures 2C  
188 and 2F; Video S1). The majority of the *Efcab9*-null sperm remained bent in the anti-hook  
189 direction (Ishijima et al., 2002) (Figures 2C and 2F), suggesting that EFCAB9 functions in the  
190 CatSper-mediated  $Ca^{2+}$  signaling pathway that normally dominates and results in the pro-hook  
191 bend (Chang and Suarez, 2011). Supporting this idea, capacitation-associated protein tyrosine  
192 phosphorylation was elevated in *Efcab9*-null spermatozoa (Figure S4C), indicating that CatSper-  
193 mediated  $Ca^{2+}$  current was aberrant as previously demonstrated by genetic disruption (Chung et  
194 al., 2017; Chung et al., 2014) or pharmacological inhibition (Navarrete et al., 2015).

195  
196 These findings led us to investigate whether EFCAB9 deficiency dysregulates the localization  
197 and/or expression of the CatSper channel complex in sperm cells. SIM images of CatSper1  
198 revealed that the structural continuity of the linear arrangement of CatSper channels is  
199 fragmented in the absence of EFCAB9 while the CatSper complex remains targeted to the  
200 flagellum (Figure 2G). We examined the protein expression of CatSper subunits in *Efcab9*-null  
201 sperm and found that all the transmembrane (TM) CatSper subunits express at 20-30% of  
202 normal (Figure 3). All these results are identical to the previously reported *CatSperz*-null  
203 phenotypes (Chung et al., 2017). Thus, we set out to determine if EFCAB9 and CatSper $\zeta$  form a  
204 functionally-relevant binary complex.

### 205 **EFCAB9 Forms a Binary Complex by Interacting Directly with CATSPER $\zeta$**

206  
207 Comparing *Efcab9*-null mice with the previously established *CatSper1*-, *d*-, and *z*-knockout lines,  
208 we discovered that EFCAB9 and CatSper $\zeta$  protein expression is strictly interdependent (Figures  
209 3A and 3B). In contrast, neither is required for CatSper channel expression (Figures 2G, 3A, and  
210 3B), but each modulates the protein expression levels and organization of CatSper  $Ca^{2+}$   
211 signaling domains (Figure 2G) (Chung et al., 2017). To further assess their functional interaction,  
212 we generated double knockout males (*Efcab9*<sup>-/-</sup>; *CatSperz*<sup>-/-</sup>). We did not observe any  
213 difference in defects of double knockout males (Figures S4D-S4F) compared with those of single  
214 *Efcab9*- or *CatSperz*-null males (Figure 2) (Chung et al., 2017). These mice were severely  
215 subfertile with ~33% pregnancy rates in mating studies (Figure S4E). Sperm from double  
216 knockout male mice failed to develop hyperactivated motility after incubation under capacitating  
217 conditions. Their sperm display flagellar waveforms similar to those observed in sperm from  
218 single *Efcab9*- or *CatSperz*-null male mice in that double knockout sperm also show the  
219 inflexible proximal tail and reduced flagellar waveform amplitude (Figures 2C-2F and S4F)  
220 (Chung et al., 2017). Sperm from double knockout males express CatSper proteins comparable  
221 to those of *Efcab9*-null sperm cells, showing thinning of the linear CatSper domains and loss of  
222 continuity (Figures S4G and S4H). These results demonstrate no additive or synergistic defects  
223 in the loss of both proteins in male germ cells, strengthening the conclusion that EFCAB9 and  
224 CatSper $\zeta$  are dispensable for CatSper channel expression.

225  
226 To determine whether EFCAB9 binds CatSper $\zeta$ , we carried out immunoprecipitation and pull-  
227 down analysis. For immunoprecipitation experiments, 293T cells were transiently transfected with  
228 plasmid(s) encoding either EFCAB9 or CatSper $\zeta$  alone, or both EFCAB9 and CatSper $\zeta$ . As seen

229 in Figure 4A, EFCAB9 and CatSper $\zeta$  both co-immunoprecipitated (Co-IP) the other protein. To  
230 test for a direct interaction between EFCAB9 and CatSper $\zeta$ , recombinant mouse EFCAB9 and  
231 CatSper $\zeta$  proteins fused to either Glutathione S-transferase (GST) or 6xHis-GB1 were purified  
232 from *E. coli* and used for *in vitro* binding assays. GST or His-tag pull-down analysis revealed a  
233 strong interaction between EFCAB9 and CatSper $\zeta$  (Figure 4B), suggesting that EFCAB9 and  
234 CatSper $\zeta$  are direct binding partners.

### 235 **The EF-Hands of EFCAB9 Mediate Ca<sup>2+</sup>-sensitive Interaction with CATSPER $\zeta$**

236 Next, we examined whether EFCAB9-CatSper $\zeta$  interaction is Ca<sup>2+</sup>-sensitive to test the predicted  
237 Ca<sup>2+</sup> binding ability of EFCAB9. GST pull-down analysis revealed a strong interaction between  
238 EFCAB9 and CatSper $\zeta$  under conditions without added Ca<sup>2+</sup> (nominal free Ca<sup>2+</sup>, typically ~ 10  
239  $\mu$ M free Ca<sup>2+</sup>) or with 2 mM Ca<sup>2+</sup> at pH 7.5 (Figures 4C, left, and 4D). In contrast, the EFCAB9  
240 and CatSper $\zeta$  dissociate, and binding is minimal when Ca<sup>2+</sup> is chelated by addition of 2 mM  
241 EGTA. These results indicate that Ca<sup>2+</sup> is required for maintaining a stable EFCAB9-  
242 CatSper $\zeta$  interaction and that Ca<sup>2+</sup> likely binds to the EF-hand domains of EFCAB9.

243 To test whether the Ca<sup>2+</sup> sensitive interaction is due to the Ca<sup>2+</sup> binding ability of EFCAB9, we  
244 generated two EFCAB9 mutants by changing conserved, negatively-charged residues in the EF-  
245 hand motifs (Figures 1B and 4C). We substituted the conserved aspartate at position 72 in EF1  
246 to asparagine and the glutamate at position 160 in EF3 to glutamine (D72N/E160Q, EFCAB9<sup>Mut2</sup>)  
247 by site-directed mutagenesis. EFCAB9<sup>Mut4</sup> was produced by additional mutations of aspartate at  
248 positions 82 in EF1 and 149 in EF3 to asparagine (D72N/D82N and D149N/E160Q) (Figures 1B  
249 and 4C). These two charge-neutralizing mutants were then used for *in vitro* binding assays.  
250 Diminished EFCAB9<sup>WT</sup> binding to CatSper $\zeta$  by chelating free Ca<sup>2+</sup> (Figure 4C, left) suggests that  
251 EFCAB9 interacts with CatSper $\zeta$  in its calcium-bound form. Since EFCAB9<sup>Mut2</sup> has significantly  
252 reduced binding to CatSper $\zeta$  (Figures 4C and 4D), D72N/E160Q mutations located at the ends  
253 of the EF1 and EF3 loops attenuate Ca<sup>2+</sup> binding of EFCAB9. Ca<sup>2+</sup> binding to EFCAB9<sup>Mut2</sup> is  
254 partly rescued by adding 2 mM Ca<sup>2+</sup> (Figures 4C; middle, and 4D). Substitution of the four acidic  
255 residues to neutralizing amino acids (D72N/D82N and D149N/E160Q, EFCAB9<sup>Mut4</sup>), however,  
256 almost eliminated EFCAB9 binding to CatSper $\zeta$  (Figure 4C, right), suggesting that EF2 has a  
257 lesser contribution to Ca<sup>2+</sup> binding. These results confirm that the EF-hands of EFCAB9 mediate  
258 Ca<sup>2+</sup> sensitive interaction, supporting the conclusion that EFCAB9, in complex with CatSper $\zeta$ ,  
259 can function as a Ca<sup>2+</sup> sensor for the CatSper channel. Thus EFCAB9-CatSper $\zeta$  appears to be  
260 important for both modulating channel activity and organizing the CatSper domains.  
261

### 262 **EFCAB9-CatSper $\zeta$ Is Required to Link Two Rows within a Single CatSper Domain**

263 CatSper channels form a highly organized Ca<sup>2+</sup> distribution network in four quadrants along the  
264 principal piece of sperm flagella, which control and coordinate Ca<sup>2+</sup> signaling along the extremely  
265 long, narrow tail during hyperactivated motility (Chung et al., 2017; Chung et al., 2014. Our  
266 previous silver-intensified immunogold electron microscope (EM) images of CatSper1 (Chung et  
267 al., 2014) suggested a two-row structure within each longitudinal CatSper compartment.  
268 However, a typical transmission EM shows only a subsection of a flagellum and standard  
269 STORM imaging with 20- to 50-nm 3D resolution did not clearly resolve the paired structure. To  
270 further assess the potential substructure and the effect of EFCAB9-CatSper $\zeta$  on thinning at  
271 repeated intervals in the absence of EFCAB9 (Figure 2G) and/or CatSper $\zeta$  (Figure S4H) (Chung  
272 et al., 2017), we employed the recently developed, 4Pi single-molecule switching nanoscope  
273 (4Pi-SMSN) that enables improved resolution of 10- to 20-nm in three dimensions (Huang et al.,

274 2016).

275  
276 We first imaged CatSper domains in wt spermatozoa by immunolabeling with a verified  
277 CatSper1 antibody (Chung et al., 2014; Ren et al., 2001). Consistent with our previous findings,  
278 we visualized the CatSper domains as distinct linear quadrants along the principal piece of the  
279 flagella (Figures 5A and 5B; Video S2). Closer inspection by 4Pi-SMSN revealed that each  
280 CatSper domain is further resolved to two rows, as clearly demonstrated by the cross-section  
281 image and the angular distributions (Figure 5A and 5B; Video S2). Interestingly, the CatSper  
282 domains are not only disrupted at periodic intervals, but the two-row structure within a domain  
283 appears to be more irregular in the absence of EFCAB9-CatSper $\zeta$  (Figures 5A and 5B; Video  
284 S3). These results illustrate that CatSper double-row organization requires EFCAB9-CatSper $\zeta$ .

285  
286 Micron-scale membrane subdomains have been demonstrated in terms of lipid segregation in  
287 the sperm head (Selvaraj et al., 2006). In sperm tails, a distinct membrane subdomain known as  
288 the flagellar zipper was reported (Friend and Fawcett, 1974; Selvaraj et al., 2007), but the  
289 function and molecular basis of this zipper structure remains a mystery. We asked whether  
290 sperm tail membrane subdomains, representing the macromolecular CatSper complex, can be  
291 visible by scanning EM (SEM). We identified a doublet of raised linear surface domains in wt  
292 mouse sperm, running each side of the longitudinal columnar surface structure down the  
293 principal piece (Figure 5C, top). One doublet is made of two ~20 nm thick membranous stripes.  
294 The absence of these raised stripes in the SEM images of *CatSper1*-null spermatozoa (Figure  
295 5C, bottom) indicates that these linear surface domains can be a protein-based membrane  
296 compartmentalization composed of the CatSper channel complex. The shorter fragmented  
297 singlet observed in *Efcab9*-null sperm flagella (Figure 5C, middle) supports the conclusion that  
298 EFCAB9-CatSper $\zeta$  has a structural function in organizing doublet CatSper domains seen in the  
299 sperm surface nanoarchitecture.

### 300 301 **EFCAB9-CatSper $\zeta$ Complex Confers pH-Dependent Activation and Ca<sup>2+</sup> Sensitivity to** 302 **CatSper Channel**

303 A rise in intracellular pH potentiates  $I_{CatSper}$  (Kirichok et al., 2006), which regulates sperm motility.  
304 In light of the reduced average whole cell  $I_{CatSper}$  amplitude in *CatSperz*-null spermatozoa (Chung  
305 et al., 2017) together with the new findings of the Ca<sup>2+</sup> dependent binary complex formation of  
306 EFCAB9-CatSper $\zeta$  (Figures 3, 4 and S4), we next examined whether the loss of EFCAB9 and  
307 CatSper $\zeta$  altogether affects the pH dependent activation and cytosolic Ca<sup>2+</sup> sensitivity of the  
308 CatSper current upon voltage changes. A reduced current can reflect changes in the number,  
309 open probability ( $P_o$ ), or elementary conductance of the channels. Given peculiarities of reduced  
310 protein expression of other companion CatSper subunits in *CatSperz*-null, *Efcab9*-null, and  
311 double knockout spermatozoa, we characterized  $I_{CatSper}$  densities (pA/pF) (Figures 6A-6F and  
312 S5).

313 Interestingly, with genetic disruption of *CatSperz*, which results in spermatozoa lacking both  
314 EFCAB9 and CatSper $\zeta$ , current densities are similar to wt (pH 6.0) (Figure S5A-S5D). At higher  
315 negative and positive voltages, CatSper currents are even slightly larger, but since these are  
316 outside the physiological range, are of uncertain significance. In agreement with previous  
317 findings (Kirichok et al., 2006),  $I_{CatSper}$  densities increase dramatically in response to addition of  
318 10 mM NH<sub>4</sub>Cl in wt spermatozoa (Figure S5). In contrast, the response to addition of 10 mM  
319 NH<sub>4</sub>Cl was only modest in *CatSperz*-null sperm cells (Figure S5), suggesting a compromised

320 channel activation by intracellular alkalinization. These results provide evidence that EFCAB9-  
321 CatSper $\zeta$  regulates pH-dependent CatSper activation.

322 Low free Ca<sup>2+</sup> (<10 nM, buffered by 2 mM EGTA) largely eliminated the interaction between  
323 purified recombinant EFCAB9 and CatSper $\zeta$  *in vitro* (Figures 4C and 4D). To directly test the  
324 Ca<sup>2+</sup> sensitivity of the pH-dependent CatSper activation, we recorded the currents with buffered  
325 [free-Ca<sup>2+</sup>] at a fixed intracellular pH in pipette (Figures 6A-6F). At acidic intracellular pH (pH<sub>i</sub> =  
326 6.0), CatSper channel was mainly closed in the inward direction in both wt and *Efcab9*-null  
327 sperm during voltage step regardless of intracellular Ca<sup>2+</sup> concentrations. This result suggests  
328 that the apparent Ca<sup>2+</sup> sensitivity of the CatSper channel is low at acidic pH, preventing channel  
329 full activation. However, alkaline intracellular pH (pH<sub>i</sub> = 7.4) dramatically potentiated CatSper  
330 channel activation in wt spermatozoa (20-fold) but to a much less degree in *Efcab9*-null sperm (~  
331 5 fold) particularly in the presence of 10 μM intracellular free Ca<sup>2+</sup> (Figures 6A-6F), which  
332 corresponds to calcium levels in the vicinity of calcium channels upon Ca<sup>2+</sup> entry (Naraghi and  
333 Neher, 1997). Thus, pH presumably tunes the Ca<sup>2+</sup> sensitivity of EFCAB9, triggering a  
334 conformational change, which change the affinity of EFCAB9 for CatSper $\zeta$  within the binary  
335 complex.

336 To better understand the pH-dependent Ca<sup>2+</sup> gating mechanisms of CatSper by EFCAB9-  
337 CatSper $\zeta$ , we performed GST pull-down analysis of EFCAB9/CatSper $\zeta$  interactions at varying  
338 pH using purified recombinant proteins in nominal free calcium solution without adding any  
339 additional calcium ions (Figures 6G and 6H). Usually, such solutions contain about 10 μM free  
340 calcium as a trace ion. We found that the amount of CatSper $\zeta$  bound to wt EFCAB9 gradually  
341 decreases when pH is raised (Figure 6G, left, and 6H). The interaction is further diminished  
342 when GST pull-down was performed with EFCAB9<sup>Mut2</sup> (Figure 6G, right, and 6H). These data  
343 support our conclusion that the EFCAB9 is a pH-dependent Ca<sup>2+</sup> sensor to activate CatSper  
344 channel, indicating that evolution developed ways to limit CatSper-mediated Ca<sup>2+</sup> entry before  
345 capacitation-associated intracellular alkalinization in mammals.

### 346 **EFCAB9-CatSper $\zeta$ Interacts with Cytoplasmic Mouth of CatSper Channel Pore**

347 Presumably due to the complex composition and the organization into highly ordered arrays  
348 (Figures 3 and 5), native CatSper channel complex is tightly associated with the cytoskeletal  
349 structures and not solubilized from mature sperm cells (*unpublished data*). Therefore, we  
350 examined molecular interaction between EFCAB9-CatSper $\zeta$  and individual CatSper subunits by  
351 performing Co-IP in a heterologous system and pull-down assays using purified recombinant  
352 proteins (Figures 7A and 7B and S6A-F). HA-tagged EFCAB9 and V5-tagged CatSper $\zeta$  encoded  
353 by a bi-cistronic plasmid were transiently expressed in 293T cells with either one of the CatSper  
354 subunits. Co-IP revealed that the EFCAB9-CatSper $\zeta$  complex interacts with each of CatSper1-4  
355 (Figures 7A and S6A-S6C) but has little to no interaction with the auxiliary transmembrane  
356 subunits ( $\beta$ ,  $\gamma$ ,  $\delta$ , and  $\epsilon$ ) (Figures 7B), suggesting that EFCAB9-CatSper $\zeta$  interacts mainly with the  
357 channel pore. The remarkably histidine-rich N-terminus of CatSper1 was suggested as a  
358 candidate for the pH-sensor of CatSper channel (Kirichok et al., 2006; Ren et al., 2001), yet our  
359 electrophysiology results strongly suggest that the EFCAB9-CatSper $\zeta$  complex can account for  
360 the pH-dependence of channel activation (Figures 6 and S5). Interestingly, pairwise-distance  
361 analysis of amino acid sequences showed that the CatSper1 N-terminal domain and  
362 CatSper $\zeta$  are highly divergent among mammalian species in contrast to EFCAB9, the C-terminal  
363 domain of CatSper1 and the cytoplasmic domains of other CatSper  $\alpha$  subunits (Figures 7C and



364 S6G and S6H), suggesting specific co-evolution. To further examine the potential domain  
365 interaction between CatSper1 and EFCAB9-CatSper $\zeta$ , we performed pull-down analysis  
366 between recombinant amino (N1-150) or the carboxyl (C574-686) terminus of CatSper1 and the  
367 recombinant CatSper $\zeta$  or EFCAB9-CatSper $\zeta$  complex (Figures S6D-S6F). We found no  
368 evidence of direct interaction between either the carboxyl or amino terminal domain of CatSper1  
369 and EFCAB9-CatSper $\zeta$  or CatSper $\zeta$  (Figures S6E and S6F). This does not, however, rule out  
370 the possibility that the N-terminus has a separate pH-dependent effect on gating, or that it binds  
371 Zn<sup>2+</sup> or other modulators.

372

## 373 Discussion

374

375 We propose a molecular mechanism regulating domain organization and pH-dependent  
376 activation of the CatSper channel (Figures 7D and 7E). Functional characterization of EFCAB9 in  
377 complex with CatSper $\zeta$  links the CatSper downstream Ca<sup>2+</sup> signaling pathway and sperm  
378 hyperactivated motility. Our results show that EFCAB9, a protein missing in the *CatSper1*-null  
379 sperm lacking CatSper channel expression, is an evolutionarily conserved CatSper channel  
380 component. EFCAB9 is not required for functional CatSper channel formation. Instead, EFCAB9  
381 forms a binary complex with CatSper $\zeta$  through a direct and Ca<sup>2+</sup> sensitive interaction. The  
382 EFCAB9-CatSper $\zeta$  complex organizes the doublet CatSper Ca<sup>2+</sup> signaling domains. Mutant  
383 CatSper channels lacking EFCAB9-CatSper $\zeta$  largely failed to respond to a rise in intracellular pH,  
384 leading to severe male subfertility. One possibility is that calcium entering via CatSper rapidly  
385 binds EFCAB9 that, by altering its association with the channel complex, maximizes flagellar  
386 shape and motility change in adaptation to hyperactivating conditions. In non-hyperactivating  
387 conditions, such as when pH is low, CatSper $\zeta$ -complexed EFCAB9 limits calcium entry via  
388 CatSper.

389

## 390 Significance of the CatSper Proteome Screen and Identification of EFCAB9

391 The identification of all the nine known CatSper subunits and EFCAB9 in the ‘strong  
392 downregulation cluster’ suggests that the screen is presumably near saturation. The lack of  
393 significant change in overall protein expression in *CatSper1*-null compared to wt spermatozoa  
394 suggests that there is no major compensatory protein expression induced by the loss of the  
395 CatSper channel complex.

396

397 Our comparative screen identified many EF-hand containing proteins, which include Centrin1,  
398 EFCAB1, 2, 3, 5, 6, 9, 10, EFHB, EFHC2, PLC $\zeta$ , PPEF1, LETM1, and CaM (Table S1). Among  
399 these, only EFCAB9 showed significant change with the loss of CatSper subunits. Since the EF-  
400 hand is one of the major Ca<sup>2+</sup>-binding regions found on many of the Ca<sup>2+</sup> sensors, we propose  
401 that EFCAB9 is specialized for the CatSper channel. Intriguingly, the *Efcab9* gene shares the  
402 unique pattern of lineage-specific gains and losses of other CatSper genes (CatSper1-4,  
403 CatSper $\beta$ ,  $\gamma$ , and  $\epsilon$ ) from single-celled eukaryotic flagellates (Figure S1). This suggests that  
404 *Efcab9* is a part of the set of core genes comprising an evolutionarily conserved unit of flagellar  
405 Ca<sup>2+</sup> channel.

406

407 The EF hand calcium binding motif contains canonical 12-residues crucial to coordinate the  
408 calcium ion (Gifford et al., 2007). EF-hands tend to occur in pairs, which form a discrete domain.  
409 For example, the classical sensor CaM has four EF-hands that comprise N- and C-terminal  
410 lobes; each lobe contains a pair of EF-hands (N-lobe: CaM-EF1/2 and C-lobe: CaM-EF3/4,  
411 Figure S2A). Ca<sup>2+</sup> binding induces a conformational change in the EF-hand motif, influencing

412 interaction with target proteins. EFCAB9 is a rare example of odd-numbered EF-hand proteins  
413 (Figure 1B). The EF-hand corresponding to CaM's EF1 is absent, resulting in a single, non-  
414 canonical EF-hand in the N-lobe. Here, glutamate is substituted by glutamine or lysine at the  
415 twelfth residue in various species including mouse and human (EFCAB9-EF1, Figures 1B and  
416 S2C). Substitution at this position was previously shown to disable Ca<sup>2+</sup> binding in the CaM EF-  
417 hand motif (Beckingham, 1991). In mammals, the first EF-hand in the EFCBA9 C-lobe also lacks  
418 glutamate at the EF loop's twelfth position (EFCAB9-EF2). We surmise that this enables  
419 EFCAB9 to bind CatSper $\zeta$ , a mammalian-specific CatSper component, albeit with a loss in Ca<sup>2+</sup>  
420 affinity.

### 421 422 **EFCAB9 is a Ca<sup>2+</sup> Sensor for CatSper Channel**

423 Cytoplasmic calcium binds directly to channel proteins, or through adaptor or modulatory  
424 proteins, to regulate their activity (Clapham, 2007; Yu and Catterall, 2004). Examples of the  
425 intrinsic Ca<sup>2+</sup> sensors include the voltage-gated Ca<sup>2+</sup> channels, Ca<sub>v</sub>1.2 (Van Petegem et al.,  
426 2005) and the *Arabidopsis thaliana* two pore channel, TPC1 (Guo et al., 2016), as well as RCK-  
427 motifs in calcium-regulating BK potassium channels (Piskorowski and Aldrich, 2002). EF-hands  
428 are found within the cytoplasmic regions of these channel proteins and alter channel function  
429 upon localized calcium accumulation. In contrast, the small conductance Ca<sup>2+</sup> activated K<sup>+</sup>  
430 channel, SK (Lee and MacKinnon, 2018) and the subfamily of KCNQ voltage-gated K<sup>+</sup> channels,  
431 Kv7.4 (Chang et al., 2018) forms a complex with Ca<sup>2+</sup> binding protein, CaM, which regulates  
432 Ca<sup>2+</sup> dependent activation.

433  
434 None of the cytoplasmic regions of the nine CatSper subunits contains known calcium/CaM  
435 binding motifs. In the current study, we report EFCAB9 as a Ca<sup>2+</sup> sensing auxiliary subunit for  
436 CatSper channel and establish a regulatory mechanism based on the interaction with the binary  
437 EFCAB9-CatSper $\zeta$  complex. Our combinatorial mutagenesis studies reveal that EF1 and/or EF3  
438 of EFCAB9 bind Ca<sup>2+</sup>. The contribution of individual EF-hands in Ca<sup>2+</sup>-binding and/or the  
439 interaction with CatSper $\zeta$  will require further investigation.

440  
441 In the absence of active CatSper-mediated Ca<sup>2+</sup> entry before capacitation, EFCAB9-CatSper $\zeta$   
442 pre-associates with the channel at basal levels of intracellular (~100 nM free) calcium. In this  
443 resting state, the channel pore would be mostly closed. In the presence of increasing Ca<sup>2+</sup>  
444 concentrations under capacitating conditions, Ca<sup>2+</sup>-binding to EFCAB9 is likely to cause changes  
445 in the structural conformation of EFCAB9, which affects the interaction with the CatSper channel  
446 to control channel activity. The CatSper channel strongly responds to intracellular alkalinization,  
447 particularly in the presence of cytosolic free Ca<sup>2+</sup> (Figure 6A-F). In the absence of EFCAB9-  
448 CatSper $\zeta$ , the CatSper channel compromises Ca<sup>2+</sup> sensitivity in the pH-dependent channel  
449 activation.

### 450 451 **EFCAB9 Couples pH- and Ca<sup>2+</sup> Sensing**

452 Intracellular pH changes rapidly with sperm in response to the environment; CatSper is activated  
453 by intracellular alkalinization in mammals and marine invertebrate (Kirichok et al., 2006; Lishko  
454 et al., 2010; Lishko et al., 2011; Miller et al., 2015; Seifert et al., 2015; Strunker et al., 2011).  
455 However, this pH-dependent activation of CatSper has been explained through speculation  
456 about amino acid properties and sequence homology. For example, the remarkably histidine-rich  
457 amino terminus of CatSper1 subunit has been proposed to sense intracellular pH or bind to Zn<sup>2+</sup>  
458 (Chung et al., 2011; Kirichok et al., 2006). The inability to heterologously express functional  
459 CatSper channels has prevented mutagenesis studies from directly testing these ideas.

460 Interestingly, mouse and human CatSper have differential pH sensitivity despite having similar  
461 histidine-rich CatSper1 N-termini (Miller et al., 2015), and pH changes alone are not enough to  
462 gate human CatSper channel (Lishko et al., 2010; Strunker et al., 2011). Indeed, intracellular  
463 alkalization is sufficient to activate sea urchin CatSper channels, despite their lack of a  
464 histidine-enriched N-terminus (Seifert et al., 2015). These results suggest that CatSper pH-  
465 sensing is likely to utilize an evolutionarily conserved mechanism.

466  
467 We hypothesize that, when closed at rest, CatSper $\zeta$ -complexed EFCAB9 lies near the  
468 cytoplasmic mouth of the pore, inhibiting the channel gating by ensuring its closed conformation.  
469 pH<sub>i</sub> elevation during capacitation partially dissociates EFCAB9 from CatSper $\zeta$ , which releases  
470 gate inhibition and opens the pore, enabling EFCAB9 to bind entering Ca<sup>2+</sup> and undergo a  
471 conformational change to maintain the prolonged open state of the channel. Mammalian  
472 EFCAB9 couple pH and Ca<sup>2+</sup> sensing presumably by adopting several substitutions of the  
473 functionally important residues in the EF-hands. For example, glutamate at EF-loop position 12  
474 is preserved in all three EF-hands of sea urchin EFCAB9. However, it is replaced by asparagine  
475 in the EFCAB9's non-canonical EF2 in mammals. The same position in the EFCAB9 EF1 is  
476 glutamine, while in human EFCAB9 it is lysine. These changes can contribute to differences in  
477 the pH sensitivities between mouse and human CatSper. Likewise, single amino acid substitution  
478 of another sperm ion channel also alters the sensitivities to both pH and Ca<sup>2+</sup>. A natural variant  
479 (C382R) of SLO3 K<sup>+</sup> channels of human sperm, which is located between the pore and the  
480 cytoplasmic gating ring, has enhanced sensitivities to pH and Ca<sup>2+</sup> (Geng et al., 2017). Thus,  
481 loss of negative charges in EFCAB9 should lead to a reduction in binding to Ca<sup>2+</sup> but might allow  
482 EFCAB9 to acquire pH sensitivity and presumably the interaction with CatSper $\zeta$ .

483  
484 The absence of EFCAB9 and/or CatSper $\zeta$  did not completely eliminate the pH dependence nor  
485 the requirement of cytosolic Ca<sup>2+</sup> for CatSper activation (Figures 6 and S5). Such absence,  
486 however, makes the complex much less responsive to alkalization in the presence of  
487 physiologically relevant calcium, which ultimately makes the channel less efficient Ca<sup>2+</sup>  
488 conductor. It is possible that additional molecular determinants exist for CatSper pH and Ca<sup>2+</sup>  
489 sensing in mammals. It is intriguing that one of the proteins from the proteomic screen contains  
490 C2 Ca<sup>2+</sup> binding domains, leaving room for future research. Interestingly, amino acid sequences  
491 of CatSper $\zeta$  are variable among mammals along with the histidine-enriched CatSper1-N termini.  
492 In contrast, EFCAB9 and the cytoplasmic domains of other pore-forming subunits are  
493 evolutionarily conserved (Figures 7C and S6G). It is reasonable to hypothesize that CatSper $\zeta$   
494 and CatSper1-N termini co-evolved to fine tune variable CatSper pH sensitivity among different  
495 mammalian species. Another potential region is CatSper2's C-terminus: mouse CatSper2 has a  
496 ~35 amino acid aspartate-rich region while human CatSper2 has an ~80 amino acid serine-rich  
497 region. The species-specific features also provide an explanation for the remaining pH sensor  
498 components and the different pH sensitivity between mouse and human CatSper channels.

### 500 **Role of EFCAB9-CatSper $\zeta$ in CatSper Domain Organization**

501 The two-row structure within a single CatSper quadrant is reminiscent of the previously reported  
502 flagellar zipper (Friend and Fawcett, 1974; Selvaraj et al., 2007). Whether the CatSper linear  
503 domains are the molecular basis of the zipper structure remains to be further explored.  
504 Intriguingly, a high-order zipper structure was recently modeled from a quaternary structure of  
505 CatSper tetramer, based on the potential cross-linking ability of the evolutionarily conserved  
506 cysteine residues of mammalian CatSper  $\alpha$  subunits (Bystroff, 2018). Heterologous  
507 reconstitution of the CatSper channel for structural studies remains at a standstill. Therefore, a

508 possibility of a regularly repeating, quaternary structure of the CatSper channel complex  
509 suggests that a direct application of rapidly advancing cryo-EM and cryo-focused ion beam  
510 techniques to the sperm tail might be a viable, alternative route for determining molecular details  
511 and structure of the CatSper channel. The CatSper complex has multiple transmembrane  
512 auxiliary subunits ( $\beta$ ,  $\gamma$ ,  $\delta$ , and  $\epsilon$ ) with large extracellular domains. Any information of the sperm  
513 surface nanostructure of CatSper will provide a better understanding of these essential, but  
514 otherwise unknown, proteins in functional regulation of CatSper.  
515

516 Our data illustrate that the loss of EFCAB9-CatSper $\zeta$  results in reduction of the two-row structure  
517 to an irregular single structure. While we cannot separate the individual CatSper $\zeta$  function from  
518 EFCAB9, it is reasonable to hypothesize that CatSper $\zeta$  serves a role in membrane trafficking  
519 and scaffolding. CatSper $\zeta$  might adapt to cytoskeletal structures for the CatSper complex to  
520 traffic to the flagellar membrane domains. The fibrous sheath, a cytoskeletal structure unique to  
521 the mammalian sperm, lies under the flagellar membrane of the principal piece (Eddy, 2007).  
522 Thus, mammalian-specific CatSper $\zeta$  (Chung et al., 2017) may support the linear arrangement of  
523 the CatSper channel complex by linking to an FS component during flagellar development. At the  
524 same time, CatSper $\zeta$  interacts with the pore-forming CatSper  $\alpha$  subunits and EFCAB9 (Figures 4,  
525 7, and S6), thus bringing EFCAB9 close to the pore. The CatSper  $\alpha$  subunits may form a  
526 tetrameric pore via coiled-coil domains in the C-terminus (Lobley et al., 2003), leaving the N-  
527 terminal domains as good candidate EFCAB9-CatSper $\zeta$  interaction site(s). Surprisingly, neither  
528 the purified CatSper1 N- nor C-terminal domain directly bind the EFCAB9-CatSper $\zeta$  complex or  
529 CatSper $\zeta$  alone. These results suggest that the interaction of EFCAB9-CatSper $\zeta$  with the pore is  
530 not binary between CatSper1 and CatSper $\zeta$ , but rather complex, probably involving multiple pore  
531 subunits. Future studies should further enlighten the molecular mechanisms governing the  
532 coupling between the CatSper domain organization and channel activity. Other proteins identified  
533 in the comparative proteome screen will serve as a foundation to this end.  
534

535 In summary, we have gained fundamental insights on the regulatory mechanisms of the CatSper  
536 channel activity and its domain organization. First, we have identified EFCAB9 as an  
537 evolutionarily conserved component of the CatSper channel and provided evidence that the  
538 EFCAB9-CatSper $\zeta$  binary complexes are master integrators linking pH and Ca<sup>2+</sup> sensing.  
539 CatSper $\zeta$ -complexed EFCAB9 normally limits Ca<sup>2+</sup> gating prior to alkalization but, when pH<sub>i</sub>  
540 rises, CatSper $\zeta$ -free EFCAB9 confers pH-dependent activation of CatSper channels. This  
541 coordination is achieved by the Ca<sup>2+</sup> sensitive and pH-dependent interaction of EFCAB9 and  
542 CatSper $\zeta$ . We further show that EFCAB9-CatSper $\zeta$  is associated with the channel pore and  
543 required for the two-row structure of each single CatSper linear domain, providing a precedent  
544 for a linking mechanism for organizing suprastructural domain organization. This study highlights  
545 the dual function of EFCAB9-CatSper $\zeta$  in gatekeeping and domain organization of CatSper.  
546

#### 547 **ACKNOWLEDGMENTS**

548 We thank David E. Clapham for sharing reagents (*Efcab9* founder mice, hCatSper1-GFP cell line,  
549 *pGEX2T2-mCatSper1-N150*) and critical reading of the draft, Sang-Hee Shim for sharing  
550 algorithm for angular plots, Jong-Nam Oh for assistance in immunocytochemistry with human  
551 sperm samples, and the Yale Center for Cellular and Molecular Imaging for assistance in  
552 scanning electron microscopy. This work was supported by start-up funds from Yale University  
553 School of Medicine, a Goodman-Gilman Scholar Award-2015, and a Rudolf J. Anderson  
554 Fellowship award to J.-J.C., by NIH R01GM111802, Pew Biomedical Scholars and Rose Hill  
555 awards, and Packer Wentz Endowment Will to P.V.L., and by the Wellcome Trust

556 (203285/B/16/Z) and the Yale Diabetes Research Center (NIH P30 DK045735) to J.B.

557  
558 **AUTHOR CONTRIBUTION**  
559 J.-J.C. conceived and supervised the project. J.-J.C. and J.Y.H. designed, performed, and  
560 analyzed experiments. J.-J.C. created Efcab9-null mice, did initial characterization, and  
561 contributed to all of the 4Pi-SMSN and SEM imaging. J.Y.H. performed comparative genomic  
562 screens, molecular and cell biology and protein chemistry experiments including expression  
563 construct generation, protein purification, immunocytochemistry, confocal and SIM imaging, and  
564 motility analysis. N.M. did electrophysiological recordings and N.M., P.V.L., and J.-J.C. analyzed  
565 the electrophysiological data. Y.Z. performed 4Pi-SMSN imaging, image analysis, and rendering.  
566 J.-J.C. and R.A.E. performed proteomic experiments, and J.-J.C., J.Y.H., and R.A.E. analyzed  
567 the proteomic data. S.P.G., J.B., and P.V.L. provided crucial reagents and equipment. J.Y.H. and  
568 J.-J.C. assembled figures and wrote the manuscript with the input from the co-authors.

569  
570 **DECLARATION OF INTERESTS**  
571 The authors declare no competing interests.

572

573 **REFERENCES**

- 574
- 575 Avenarius, M.R., Hildebrand, M.S., Zhang, Y., Meyer, N.C., Smith, L.L., Kahrizi, K., Najmabadi,  
576 H., and Smith, R.J. (2009). Human male infertility caused by mutations in the CATSPER1  
577 channel protein. *Am J Hum Genet* **84**, 505-510.
- 578 Beckingham, K. (1991). Use of site-directed mutations in the individual Ca<sup>2+</sup>(+)-binding sites of  
579 calmodulin to examine Ca<sup>2+</sup>(+)-induced conformational changes. *J Biol Chem* **266**, 6027-6030.
- 580 Bohmer, M., Van, Q., Weyand, I., Hagen, V., Beyermann, M., Matsumoto, M., Hoshi, M.,  
581 Hildebrand, E., and Kaupp, U.B. (2005). Ca<sup>2+</sup> spikes in the flagellum control chemotactic  
582 behavior of sperm. *EMBO J* **24**, 2741-2752.
- 583 Bystroff, C. (2018). Intramembranal disulfide cross-linking elucidates the super-quaternary  
584 structure of mammalian CatSpers. *Reprod Biol* **18**, 76-82.
- 585 Carlson, A.E., Westenbroek, R.E., Quill, T., Ren, D., Clapham, D.E., Hille, B., Garbers, D.L., and  
586 Babcock, D.F. (2003). CatSper1 required for evoked Ca<sup>2+</sup> entry and control of flagellar function  
587 in sperm. *Proc Natl Acad Sci U S A* **100**, 14864-14868.
- 588 Castaneda, J.M., Hua, R., Miyata, H., Oji, A., Guo, Y., Cheng, Y., Zhou, T., Guo, X., Cui, Y., Shen,  
589 B., *et al.* (2017). TCTE1 is a conserved component of the dynein regulatory complex and is  
590 required for motility and metabolism in mouse spermatozoa. *Proc Natl Acad Sci U S A* **114**,  
591 E5370-E5378.
- 592 Chang, A., Abderemane-Ali, F., Hura, G.L., Rossen, N.D., Gate, R.E., and Minor, D.L., Jr. (2018).  
593 A Calmodulin C-Lobe Ca<sup>2+</sup>-Dependent Switch Governs Kv7 Channel Function. *Neuron* **97**,  
594 836-852 e836.
- 595 Chang, H., and Suarez, S.S. (2011). Two distinct Ca<sup>2+</sup> signaling pathways modulate sperm  
596 flagellar beating patterns in mice. *Biol Reprod* **85**, 296-305.
- 597 Chung, J.J., Miki, K., Kim, D., Shim, S.H., Shi, H.F., Hwang, J.Y., Cai, X., Iseri, Y., Zhuang, X.,  
598 and Clapham, D.E. (2017). CatSperzeta regulates the structural continuity of sperm Ca<sup>2+</sup>  
599 signaling domains and is required for normal fertility. *Elife* **6**.
- 600 Chung, J.J., Navarro, B., Krapivinsky, G., Krapivinsky, L., and Clapham, D.E. (2011). A novel  
601 gene required for male fertility and functional CATSPER channel formation in spermatozoa. *Nat*  
602 *Commun* **2**, 153.
- 603 Chung, J.J., Shim, S.H., Everley, R.A., Gygi, S.P., Zhuang, X., and Clapham, D.E. (2014).  
604 Structurally distinct Ca<sup>2+</sup> signaling domains of sperm flagella orchestrate tyrosine  
605 phosphorylation and motility. *Cell* **157**, 808-822.
- 606 Clapham, D.E. (2007). Calcium signaling. *Cell* **131**, 1047-1058.
- 607 Eddy, E. (2007). The scaffold role of the fibrous sheath. *Society of Reproduction and Fertility*  
608 *supplement* **65**, 45-62.
- 609 Edgar, R.C. (2004). MUSCLE: multiple sequence alignment with high accuracy and high  
610 throughput. *Nucleic acids research* **32**, 1792-1797.
- 611 Friend, D.S., and Fawcett, D.W. (1974). Membrane differentiations in freeze-fractured  
612 mammalian sperm. *J Cell Biol* **63**, 641-664.
- 613 Geng, Y., Ferreira, J.J., Dzikunu, V., Butler, A., Lybaert, P., Yuan, P., Magleby, K.L., Salkoff, L.,  
614 and Santi, C.M. (2017). A genetic variant of the sperm-specific SLO3 K(+) channel has altered  
615 pH and Ca<sup>2+</sup> sensitivities. *J Biol Chem* **292**, 8978-8987.
- 616 Gifford, J.L., Walsh, M.P., and Vogel, H.J. (2007). Structures and metal-ion-binding properties of  
617 the Ca<sup>2+</sup>-binding helix-loop-helix EF-hand motifs. *Biochem J* **405**, 199-221.
- 618 Guo, J., Zeng, W., Chen, Q., Lee, C., Chen, L., Yang, Y., Cang, C., Ren, D., and Jiang, Y. (2016).  
619 Structure of the voltage-gated two-pore channel TPC1 from *Arabidopsis thaliana*. *Nature* **531**,  
620 196-201.
- 621 Hasegawa, A., Mochida, K., Inoue, H., Noda, Y., Endo, T., Watanabe, G., and Ogura, A. (2016).

622 High-yield superovulation in adult mice by anti-inhibin serum treatment combined with estrous  
623 cycle synchronization. *Biology of reproduction* **94**.

624 Hildebrand, M.S., Avenarius, M.R., Fellous, M., Zhang, Y., Meyer, N.C., Auer, J., Serres, C.,  
625 Kahrizi, K., Najmabadi, H., Beckmann, J.S., *et al.* (2010). Genetic male infertility and mutation of  
626 CATSPER ion channels. *Eur J Hum Genet* **18**, 1178-1184.

627 Ho, H.C., and Suarez, S.S. (2001). An inositol 1,4,5-trisphosphate receptor-gated intracellular  
628 Ca(2+) store is involved in regulating sperm hyperactivated motility. *Biol Reprod* **65**, 1606-1615.

629 Huang, F., Sirinakis, G., Allgeyer, E.S., Schroeder, L.K., Duim, W.C., Kromann, E.B., Phan, T.,  
630 Rivera-Molina, F.E., Myers, J.R., Irnov, I., *et al.* (2016). Ultra-High Resolution 3D Imaging of  
631 Whole Cells. *Cell* **166**, 1028-1040.

632 Ishijima, S., Baba, S.A., Mohri, H., and Suarez, S.S. (2002). Quantitative analysis of flagellar  
633 movement in hyperactivated and acrosome-reacted golden hamster spermatozoa. *Mol Reprod*  
634 *Dev* **61**, 376-384.

635 Kirichok, Y., Navarro, B., and Clapham, D.E. (2006). Whole-cell patch-clamp measurements of  
636 spermatozoa reveal an alkaline-activated Ca<sup>2+</sup> channel. *Nature* **439**, 737-740.

637 Lee, C.H., and MacKinnon, R. (2018). Activation mechanism of a human SK-calmodulin channel  
638 complex elucidated by cryo-EM structures. *Science* **360**, 508-513.

639 Lishko, P.V., Botchkina, I.L., Fedorenko, A., and Kirichok, Y. (2010). Acid extrusion from human  
640 spermatozoa is mediated by flagellar voltage-gated proton channel. *Cell* **140**, 327-337.

641 Lishko, P.V., Botchkina, I.L., and Kirichok, Y. (2011). Progesterone activates the principal Ca<sup>2+</sup>  
642 channel of human sperm. *Nature* **471**, 387-391.

643 Liu, J., Xia, J., Cho, K.H., Clapham, D.E., and Ren, D. (2007). CatSperbeta, a novel  
644 transmembrane protein in the CatSper channel complex. *J Biol Chem* **282**, 18945-18952.

645 Lobley, A., Pierron, V., Reynolds, L., Allen, L., and Michalovich, D. (2003). Identification of human  
646 and mouse CatSper3 and CatSper4 genes: characterisation of a common interaction domain  
647 and evidence for expression in testis. *Reprod Biol Endocrinol* **1**, 53.

648 Miller, M.R., Mallowitz, N., Iavarone, A.T., Safavi, R., Gracheva, E.O., Smith, J.F., Hill, R.Z.,  
649 Bautista, D.M., Kirichok, Y., and Lishko, P.V. (2016). Unconventional endocannabinoid signaling  
650 governs sperm activation via the sex hormone progesterone. *Science* **352**, 555-559.

651 Miller, M.R., Mansell, S.A., Meyers, S.A., and Lishko, P.V. (2015). Flagellar ion channels of  
652 sperm: similarities and differences between species. *Cell Calcium* **58**, 105-113.

653 Naraghi, M., and Neher, E. (1997). Linearized buffered Ca<sup>2+</sup> diffusion in microdomains and its  
654 implications for calculation of [Ca<sup>2+</sup>] at the mouth of a calcium channel. *J Neurosci* **17**, 6961-  
655 6973.

656 Navarrete, F.A., Garcia-Vazquez, F.A., Alvau, A., Escoffier, J., Krapf, D., Sanchez-Cardenas, C.,  
657 Salicioni, A.M., Darszon, A., and Visconti, P.E. (2015). Biphasic role of calcium in mouse sperm  
658 capacitation signaling pathways. *J Cell Physiol* **230**, 1758-1769.

659 Piskowski, R., and Aldrich, R.W. (2002). Calcium activation of BK(Ca) potassium channels  
660 lacking the calcium bowl and RCK domains. *Nature* **420**, 499-502.

661 Qi, H., Moran, M.M., Navarro, B., Chong, J.A., Krapivinsky, G., Krapivinsky, L., Kirichok, Y.,  
662 Ramsey, I.S., Quill, T.A., and Clapham, D.E. (2007). All four CatSper ion channel proteins are  
663 required for male fertility and sperm cell hyperactivated motility. *Proc Natl Acad Sci U S A* **104**,  
664 1219-1223.

665 Quill, T.A., Ren, D., Clapham, D.E., and Garbers, D.L. (2001). A voltage-gated ion channel  
666 expressed specifically in spermatozoa. *Proceedings of the National Academy of Sciences* **98**,  
667 12527-12531.

668 Quill, T.A., Sugden, S.A., Rossi, K.L., Doolittle, L.K., Hammer, R.E., and Garbers, D.L. (2003).  
669 Hyperactivated sperm motility driven by CatSper2 is required for fertilization. *Proc Natl Acad Sci*  
670 *U S A* **100**, 14869-14874.

671 Ren, D., Navarro, B., Perez, G., Jackson, A.C., Hsu, S., Shi, Q., Tilly, J.L., and Clapham, D.E.  
672 (2001). A sperm ion channel required for sperm motility and male fertility. *Nature* 413, 603-609.  
673 Schindelin, J., Arganda-Carreras, I., Frise, E., Kaynig, V., Longair, M., Pietzsch, T., Preibisch, S.,  
674 Rueden, C., Saalfeld, S., Schmid, B., *et al.* (2012). Fiji: an open-source platform for biological-  
675 image analysis. *Nat Methods* 9, 676-682.  
676 Seifert, R., Flick, M., Bonigk, W., Alvarez, L., Trotschel, C., Poetsch, A., Muller, A., Goodwin, N.,  
677 Pelzer, P., Kashikar, N.D., *et al.* (2015). The CatSper channel controls chemosensation in sea  
678 urchin sperm. *EMBO J* 34, 379-392.  
679 Selvaraj, V., Asano, A., Buttke, D.E., McElwee, J.L., Nelson, J.L., Wolff, C.A., Merdiushev, T.,  
680 Fornes, M.W., Cohen, A.W., Lisanti, M.P., *et al.* (2006). Segregation of micron-scale membrane  
681 sub-domains in live murine sperm. *J Cell Physiol* 206, 636-646.  
682 Selvaraj, V., Buttke, D.E., Asano, A., McElwee, J.L., Wolff, C.A., Nelson, J.L., Klaus, A.V.,  
683 Hunnicutt, G.R., and Travis, A.J. (2007). GM1 dynamics as a marker for membrane changes  
684 associated with the process of capacitation in murine and bovine spermatozoa. *J Androl* 28, 588-  
685 599.  
686 Smith, J.F., Syritsyna, O., Fellous, M., Serres, C., Mannowetz, N., Kirichok, Y., and Lishko, P.V.  
687 (2013). Disruption of the principal, progesterone-activated sperm Ca<sup>2+</sup> channel in a CatSper2-  
688 deficient infertile patient. *Proc Natl Acad Sci U S A* 110, 6823-6828.  
689 Strunker, T., Goodwin, N., Brenker, C., Kashikar, N.D., Weyand, I., Seifert, R., and Kaupp, U.B.  
690 (2011). The CatSper channel mediates progesterone-induced Ca<sup>2+</sup> influx in human sperm.  
691 *Nature* 471, 382-386.  
692 Suarez, S.S., Varosi, S.M., and Dai, X. (1993). Intracellular calcium increases with  
693 hyperactivation in intact, moving hamster sperm and oscillates with the flagellar beat cycle. *Proc*  
694 *Natl Acad Sci U S A* 90, 4660-4664.  
695 Tamura, K., Stecher, G., Peterson, D., Filipowski, A., and Kumar, S. (2013). MEGA6: Molecular  
696 Evolutionary Genetics Analysis version 6.0. *Mol Biol Evol* 30, 2725-2729.  
697 Van Petegem, F., Chatelain, F.C., and Minor Jr, D.L. (2005). Insights into voltage-gated calcium  
698 channel regulation from the structure of the Ca<sub>v</sub>1.2 IQ domain–Ca<sup>2+</sup>/calmodulin complex.  
699 *Nature Structural and Molecular Biology* 12, 1108.  
700 Villén, J., and Gygi, S.P. (2008). The SCX/IMAC enrichment approach for global phosphorylation  
701 analysis by mass spectrometry. *Nature protocols* 3, 1630.  
702 Wang, H., Liu, J., Cho, K.H., and Ren, D. (2009). A novel, single, transmembrane protein  
703 CATSPERG is associated with CATSPER1 channel protein. *Biol Reprod* 81, 539-544.  
704 Wood, C.D., Nishigaki, T., Furuta, T., Baba, S.A., and Darszon, A. (2005). Real-time analysis of  
705 the role of Ca<sup>2+</sup> in flagellar movement and motility in single sea urchin sperm. *J Cell Biol* 169,  
706 725-731.  
707 Yanagimachi, R. (1970). The movement of golden hamster spermatozoa before and after  
708 capacitation. *J Reprod Fertil* 23, 193-196.  
709 Yanagimachi, R. (2017). *The sperm cell: production, maturation, fertilization, regeneration*  
710 (Cambridge University Press).  
711 Yu, F.H., and Catterall, W.A. (2004). The VGL-chnome: a protein superfamily specialized for  
712 electrical signaling and ionic homeostasis. *Sci STKE* 2004, re15.  
713 Yue, F., Cheng, Y., Breschi, A., Vierstra, J., Wu, W., Ryba, T., Sandstrom, R., Ma, Z., Davis, C.,  
714 Pope, B.D., *et al.* (2014). A comparative encyclopedia of DNA elements in the mouse genome.  
715 *Nature* 515, 355-364.  
716



717 **Figure legends**

718

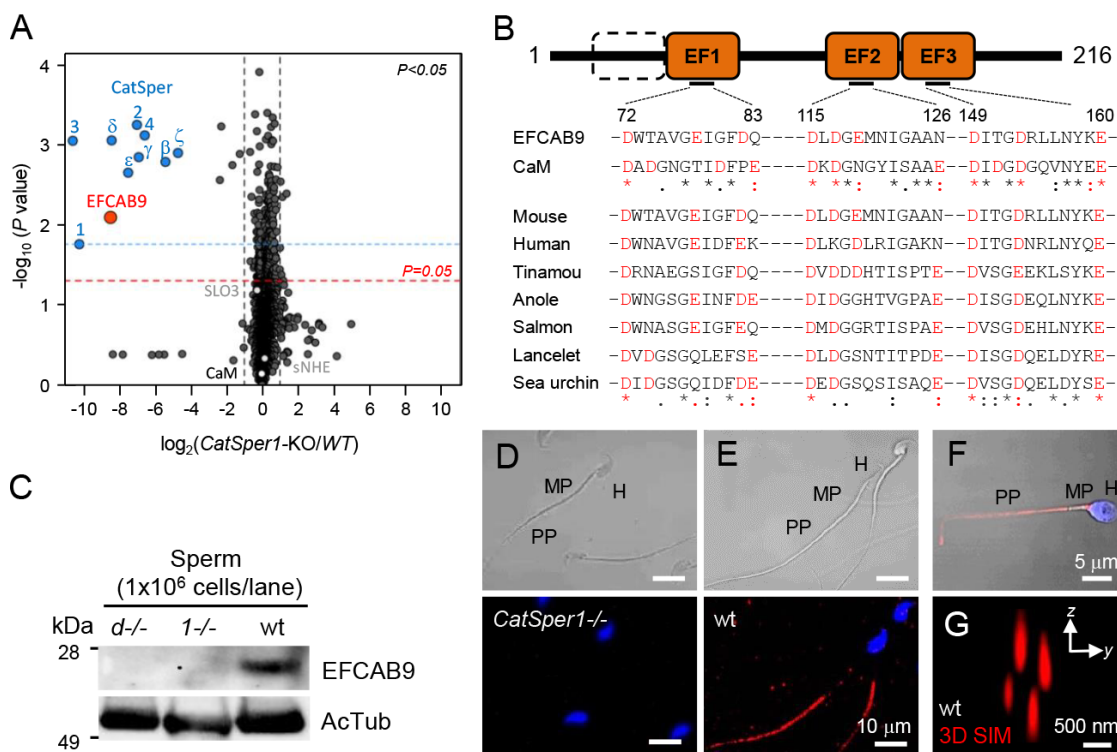

719

720

721

722

723

724

725

726

727

728

729

730

731

732

733

734

735

736

737

738

**Figure 1. EFCAB9 is an intracellular protein associated with CatSper channel complex (A)**

Quantitative analysis of whole sperm proteome from wt compared with *CatSper1*<sup>-/-</sup> mice to identify proteins associated with CatSper channel complex. Volcano plot of statistical significance against protein fold-change in *CatSper1*<sup>-/-</sup> over wt spermatozoa. Each protein is represented as a dot and is mapped according to its average fold change on the x axis and t-test *p*-value on the y axis. EFCAB9 (red dot) is one of the proteins with the most reduced protein expression in *CatSper1*<sup>-/-</sup> spermatozoa, clustered together with other CatSper subunits (blue dots) that are previously reported to express interdependently with CatSper1 in sperm cells. (B) The predicted domain structure of mouse EFCAB9 protein. Mouse EFCAB9 contains 216 amino acids with three predicted EF-hand domains represented with filled box. Empty box indicates the counterpart region aligned to the first EF-hand domain of calmodulin. Conserved acidic amino acids in the loop regions of EF-hand domains are highlighted in red. (C-E) Validation of EFCAB9 protein expression in sperm cells of wt mice compared with homozygous *CatSper1*<sup>-/-</sup> and *CatSperd*-null mice by immunoblot of total sperm extract (C) and immunofluorescence confocal images of mouse sperm (D and E). (F) Confocal immunofluorescent detection of EFCAB9 protein in human sperm. Red and blue signals indicate immunostained EFCAB9 and Hoechst-stained DNA, respectively (D-F). The corresponding DIC are shown for D and E. (G) A cross-section 3D SIM image of EFCAB9 in wt mouse sperm. See also [Figures S1 and S2](#).

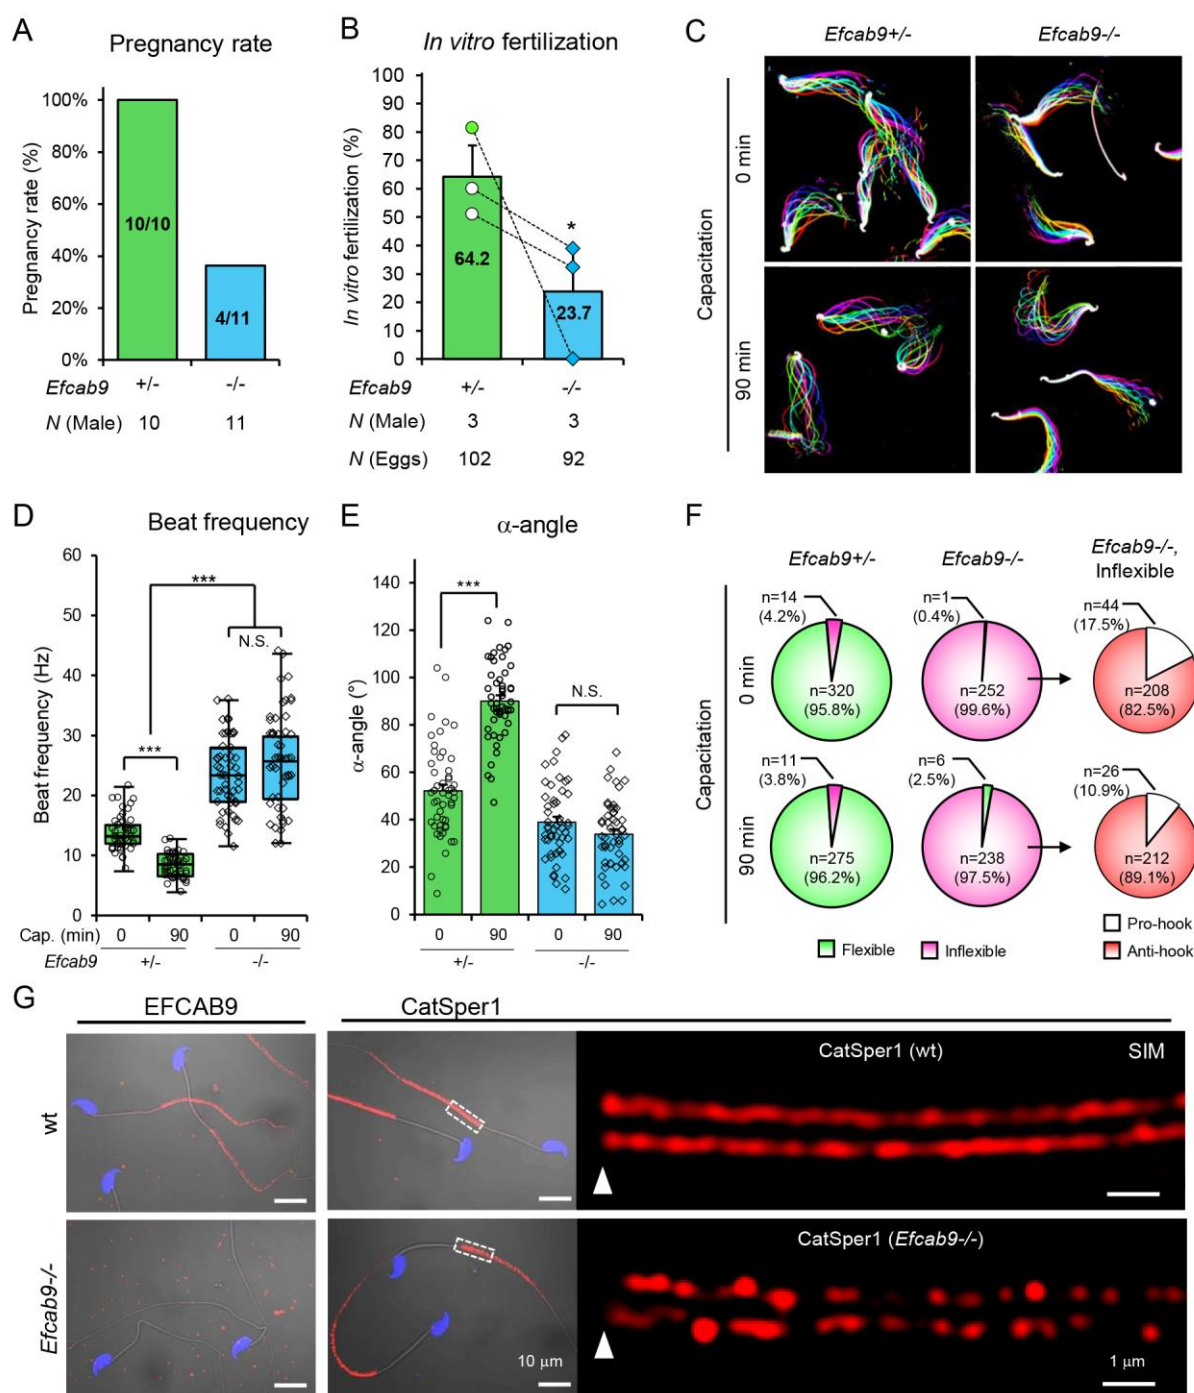

739  
740  
741  
742  
743  
744  
745  
746

**Figure 2. Genetic disruption of *Efcab9* compromise male fertility, sperm motility, and CatSper domain** (A) Percent pregnancy rate of *Efcab9*<sup>-/-</sup> compared with *Efcab9*<sup>+/-</sup> males over two months when housed together with wt females. (B) *In vitro* fertilization rate of sperm cells from *Efcab9*<sup>+/-</sup> (64.2 ± 11.0%) and *Efcab9*<sup>-/-</sup> (23.8 ± 14.7%) males with cumulus oocyte complex. \**P*<0.05. (C) Flagellar waveform of *Efcab9*<sup>+/-</sup> (left) and *Efcab9*<sup>-/-</sup> (right) sperm cells. Movies recorded at 200 fps from the cells tethered to glass coverslips before (top, 0 minute) and after

747 (bottom, 90minutes) incubating under capacitation conditions. Overlays of flagellar traces from  
748 two beat cycles are generated by hyperstacking binary images; time coded in color. (D) Beat  
749 frequency before (0 minute, *Efcab9*<sup>+/-</sup>, 13.9 ± 0.4 Hz; *EFCAB9*<sup>-/-</sup>, 23.5 ± 0.9 Hz) and after (90  
750 minutes, *Efcab9*<sup>+/-</sup>, 8.19 ± 0.27 Hz; *Efcab9*<sup>-/-</sup>, 26.2 ± 1.2 Hz) incubating under capacitation  
751 conditions is shown box plot, indicating quartile distribution. Median ± SEM, N=50 each group.  
752 \*\*\**p*<0.001. (E) The maximal bending angle of midpiece in primary anti-hook curvature was  
753 measured from *Efcab9*<sup>+/-</sup> (0 minute, 52.1 ± 2.7°; 90 minutes, 90.1 ± 2.3°) and *Efcab9*<sup>-/-</sup> (0  
754 minute, 40.0° ± 2.2; 90 minutes, 33.8 ± 2.1°) sperm, and tail parallel to head is considered to 0°.  
755 Data is represented as mean ± SEM. N=50 for each group. \*\*\**p*<0.001 (F) Flexibility and  
756 flagellar bending patterns of sperm cells from *Efcab9*<sup>+/-</sup> (left) and *Efcab9*<sup>-/-</sup> (middle and right)  
757 mice. The flexibility of sperm tails is examined and classified into flexible (green) or inflexible  
758 (magenta). Inflexible tails are further divided into pro-hook (white) or anti-hook (red) according to  
759 the direction of the flagellar bend. Sperm numbers examined from three independent  
760 experiments are shown in the pie charts. (G) *Efcab9*<sup>-/-</sup> spermatozoa have normal sperm  
761 morphology but display discontinuous CatSper domain. Overlay of confocal images and the  
762 corresponding DIC images of cells of  $\alpha$ -EFCAB9 (left) and  $\alpha$ -CatSper1 (right) immunostained  
763 sperm cells from wt (upper) and *Efcab9*<sup>-/-</sup> (lower) mice. The inset areas were subject to SIM  
764 microscopy as shown at the right side of the CatSper1 confocal images. See also [Figures S3](#)  
765 [and S4](#); [Video S1](#).  
766

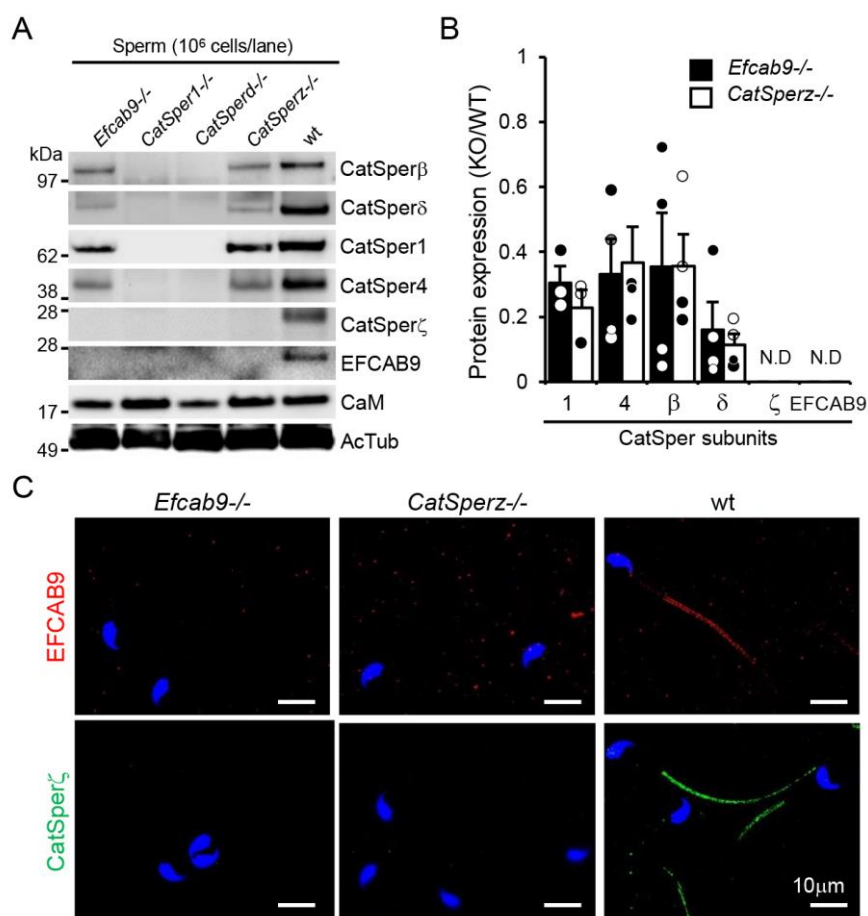

767  
768  
769 **Figure 3. EFCAB9 and CatSperζ form a binary complex in spermatozoa** (A-B) EFCAB9 and  
770 CatSperζ proteins express interdependently in spermatozoa. (A) The absence of either EFCAB9  
771 or CatSperζ is dispensable for the protein expression of all the other CatSper subunits with  
772 transmembrane domains but eliminates the expression of each other. (B) Protein expression  
773 levels of CatSper subunits in *Efcab9*<sup>-/-</sup> and *CatSperζ*<sup>-/-</sup> sperm cells compared with those of wt  
774 sperm. The relative levels of CatSper subunits in *Efcab9*<sup>-/-</sup> vs. *CatSperζ*<sup>-/-</sup> sperm are all  
775 comparable; CatSper1 (0.31 ± 0.05 vs 0.23 ± 0.06), CatSper4 (0.33 ± 0.11 vs 0.37 ± 0.11),  
776 CatSperβ (0.35 ± 0.16 vs 0.36 ± 0.10), CatSperδ (0.16 ± 0.08 vs 0.11 ± 0.03), CatSperζ and  
777 EFCAB9 (not detected). Data is represented as mean ± SEM, N=3. (C) Confocal images of  
778 immunostained EFCAB9 (red) and CatSperζ (green) in *Efcab9*<sup>-/-</sup>, *CatSperζ*<sup>-/-</sup>, and wt  
779 spermatozoa. Hoechst dye stains sperm head (blue). See also [Figure S4](#).

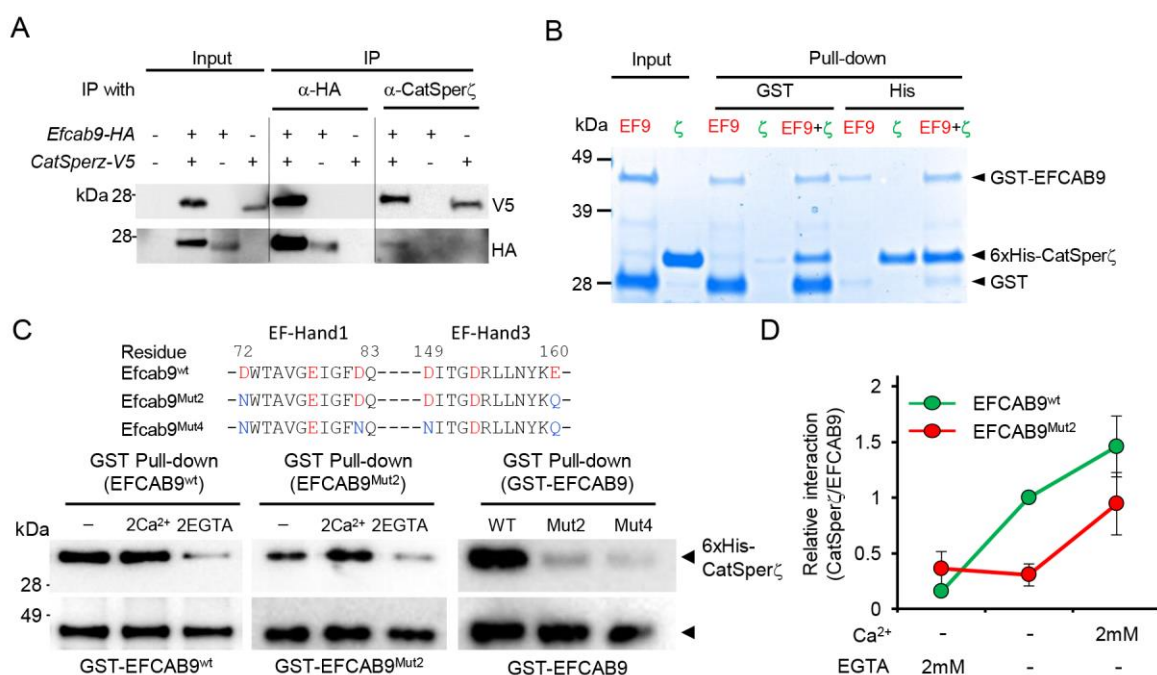

780  
781

782 **Figure 4. EFCAB9 directly binds to CatSperζ and the interaction is Ca<sup>2+</sup>- sensitive** (A) Co-  
783 immunoprecipitation of EFCAB9 with CATSEPRζ. HEK293T cells transfected with plasmids  
784 encoding HA-tagged EFCAB9 and/or V5-tagged CatSperζ were immunoprecipitated with anti-HA  
785 or anti-CatSperζ and the immunocomplexes were blotted with anti-HA or V5 antibodies. (B)  
786 Pull-down analysis of purified recombinant EFCAB9 and CatSperζ proteins. GST or His pull-down  
787 analysis was performed between full-length GST-EFCAB9 and 6xHis-tagged CatSperζ fused to  
788 Gb1. EFCAB9 and CatSperζ interact directly. (C) Ca<sup>2+</sup> dependent interaction between EFCAB9  
789 and CatSperζ through the EF hands. The mutants used are indicated as EFCAB9<sup>Mut2</sup>  
790 (D72N/E160Q) and EFCAB9<sup>Mut4</sup> (D72N/D82N and D149N/E160Q), respectively. GST pull-down  
791 analysis was performed between GST-EFCAB9 (left) or GST-EFCAB9<sup>Mut2</sup> (middle) and 6xHis-  
792 CatSperζ in medium with nominal free Ca<sup>2+</sup> (-), 2 mM CaCl<sub>2</sub> (2Ca<sup>2+</sup>), or nominally calcium-free  
793 plus 2 mM EGTA (2EGTA) at pH 7.5. The effect of mutations in the EF hands of EFCAB9 on the  
794 interaction with 6xHis-CatSperζ (right) was analyzed by GST pull-down assay in the medium  
795 with nominal free Ca<sup>2+</sup> at pH 7.5. Data is represented as mean ± SEM, N=5. (D) Relative amount  
796 of 6xHis-CatSperζ directly bound to GST pull-down EFCAB9 in various free calcium  
797 concentrations in (C). Binding buffer with nominal free Ca<sup>2+</sup> is without adding any additional  
798 calcium ions and contains ~ 10 μM free Ca<sup>2+</sup> as a trace ion. All the recombinant proteins in (B, C,  
799 and D) were purified from *E. coli*.

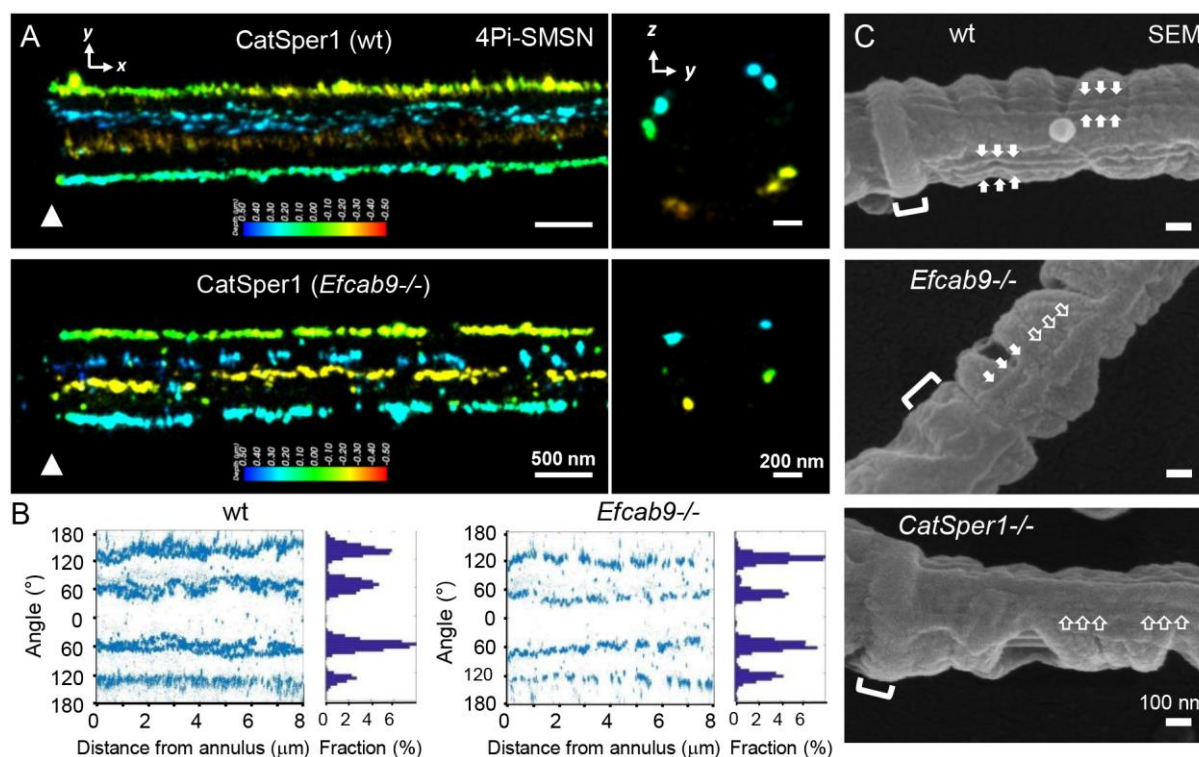

800  
 801  
 802 **Figure 5. Loss of EFCAB9 alters the two-row structures of CatSper domains and sperm**  
 803 **surface nanoarchitecture** (A) 3D 4Pi-SMSN images of CatSper1 in wt (top) and *Efcab9*<sup>-/-</sup>  
 804 (bottom) flagella. x-y projection colors encode the relative distance from the focal plane along  
 805 the z axis. Scale bar, 500 nm. Arrowheads in each panel indicate annulus. y-z cross sections  
 806 (100 nm thick) at ~ 3 um from the annulus are shown on the right. Scale bar, 200 nm. (B)  
 807 Angular distributions (left) and profile (right) of the surface-localized molecules of 4Pi-SMSN  
 808 images of CatSper1 in wt (upper) and *Efcab9*<sup>-/-</sup> (lower) shown in (A). Two-rows are seen in each  
 809 CatSper quadrant in wt but only single line in *Efcab9*<sup>-/-</sup> spermatozoa. (C) Scanning electron  
 810 microscopic images sperm flagella from wt (top), *Efcab9*<sup>-/-</sup> (middle), and *CatSper1*<sup>-/-</sup> (bottom)  
 811 mice. Two-row structure organization on the membrane surface are observed in both sides of  
 812 longitudinal column in wt sperm but only one fragmented line in *Efcab9*<sup>-/-</sup> spermatozoa. No  
 813 linear presentation is observed in *CatSper1*<sup>-/-</sup> sperm cells. Scale bar, 100 nm. See also [Video](#)  
 814 [S2](#) and [S3](#).

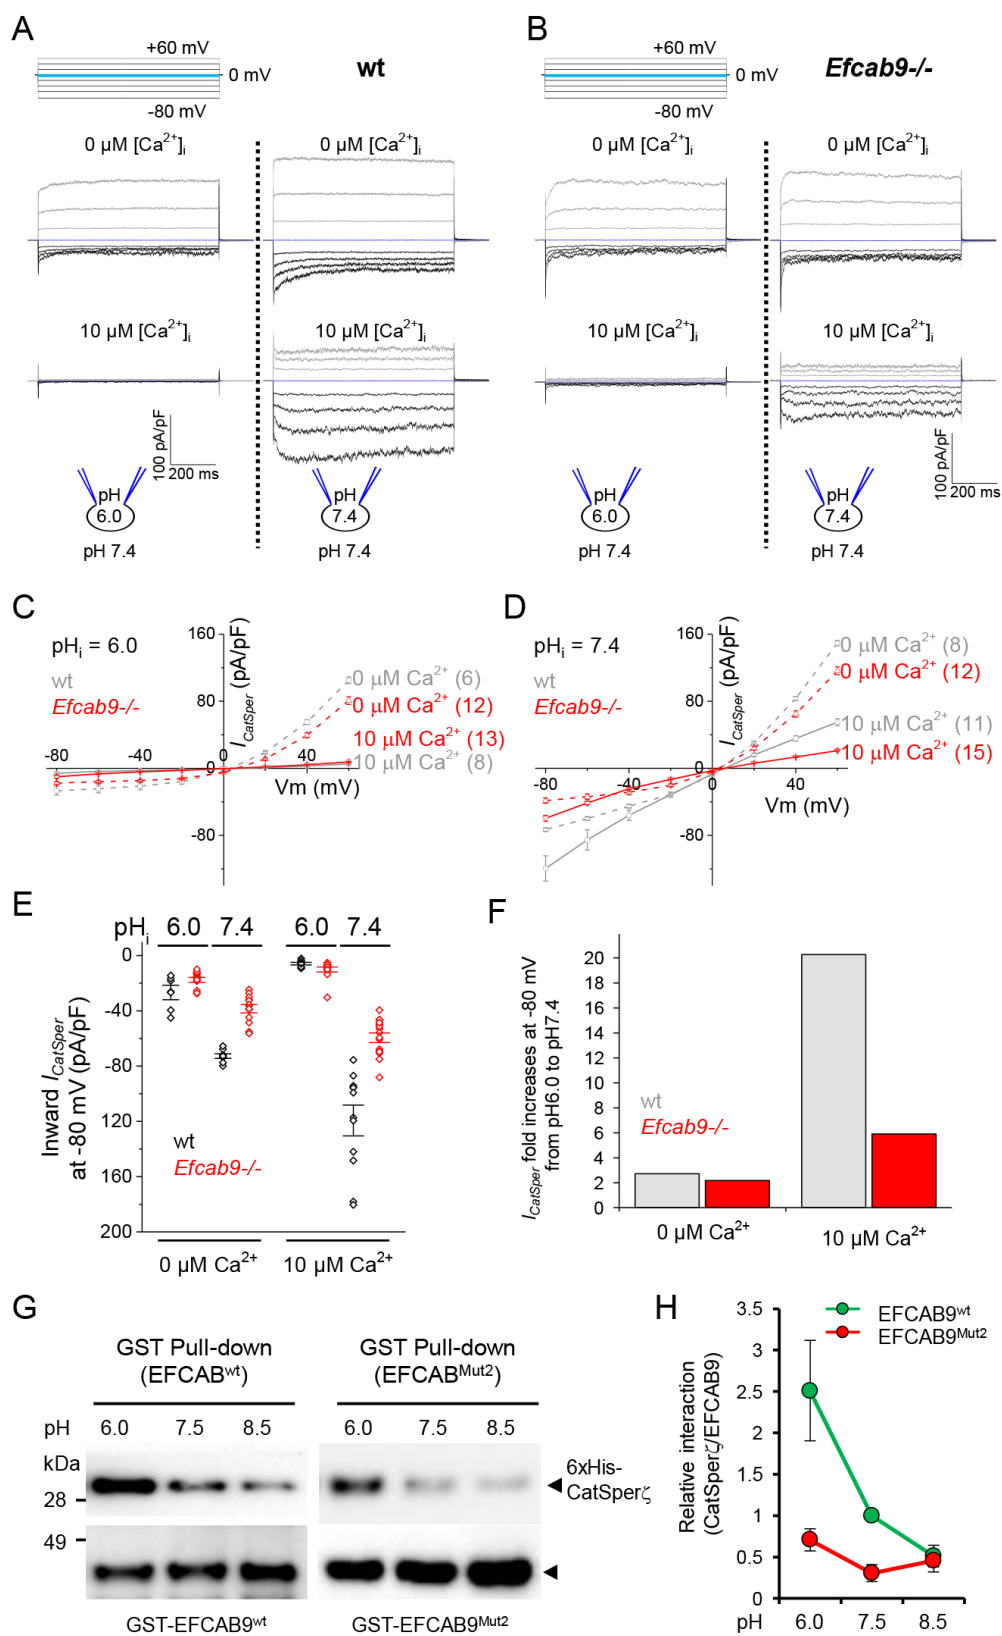

816  
817 **Figure 6. EFCAB9 confers maximal CatSper channel activity in a pH- and Ca<sup>2+</sup>-dependent**  
818 **manner.** (A-B) Representative  $I_{CatSper}$  traces from wt (A) and *Efcab9*<sup>-/-</sup> (B) spermatozoa recorded  
819 with 0  $\mu$ M (top) or 10  $\mu$ M (bottom) free intracellular calcium at intracellular pH = 6.0 (left) or  
820 intracellular pH = 7.4 (right). Currents were elicited by a step protocol from -80 mV to +60 mV in  
821 20 mV increments and a holding potential of 0 mV as shown. The cartoon indicates the  
822 intracellular and bath pH used for each panel. (C-D) I-V relationship of  $I_{CatSper}$  traces deduced at  
823 steady state levels from recordings of wt (gray lines) and *Efcab9*<sup>-/-</sup> (red lines) spermatozoa with  
824 0  $\mu$ M (dashed lines) or 10  $\mu$ M (solid lines) free intracellular calcium at pH<sub>i</sub> = 6.0 (C) and pH<sub>i</sub> = 7.4  
825 (D). (E) Averaged inward  $I_{CatSper}$  from wt (black) and *Efcab9*-null (red) sperm collected at -80 mV  
826 at respective experimental conditions. (F) Bars represent fold increase of the inward  $I_{CatSper}$  at -  
827 80 mV when switching from intracellular pH 6.0 to pH 7.4 in wt (grey) and *Efcab9*-null (red)  
828 spermatozoa. (G) EFCAB9-CatSper $\zeta$  complex dissociates when pH increases from 6.0 to 8.5.  
829 GST pull-down analysis was performed between GST-fused EFCAB9 (left) or EFCAB9<sup>Mut2</sup> (right)  
830 and 6xHis-tagged CatSper $\zeta$  under the increasing pH conditions at pH 6.0, 7.5, and 8.5. Binding  
831 buffer contains ~ 10  $\mu$ M free Ca<sup>2+</sup> as a trace ion (nominal free Ca<sup>2+</sup> without adding any additional  
832 calcium ions). (H) Quantitation of relative CatSper $\zeta$  bound to EFCAB9. N=5. All the recombinant  
833 proteins were purified from *E. coli* as in [Figure 4](#). Data is represented as mean  $\pm$  SEM (C, D, E,  
834 and H); (n) indicates the number of individual cells used. See also [Figure S5](#).  
835



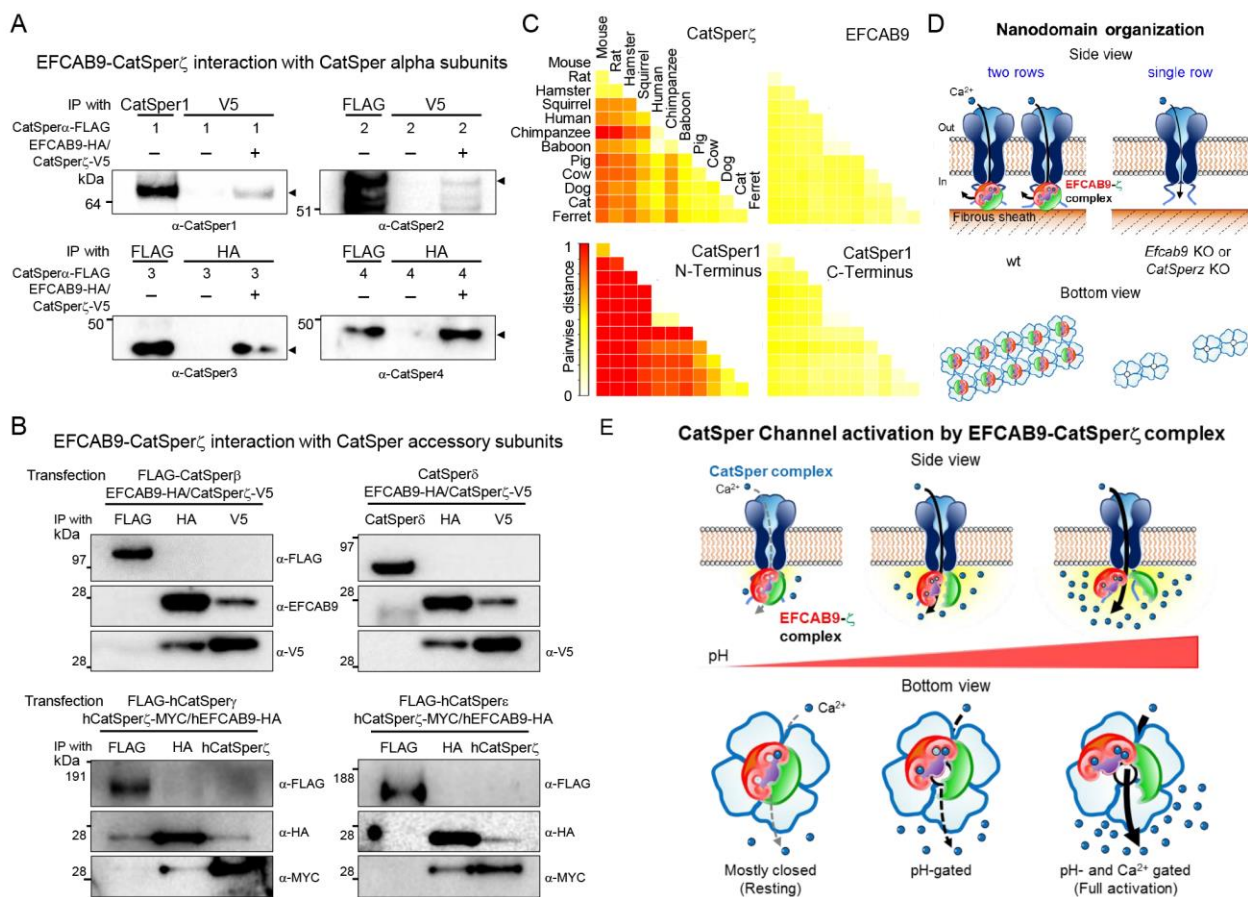

836  
837

838 **Figure 7. Molecular interaction of EFCAB9-CatSper $\zeta$  binary complex with other CatSper**  
 839 **subunits** (A) Co-immunoprecipitation assays were performed from 293T cells transfected with  
 840 plasmids encoding CatSper $\zeta$ -V5-(P2A)-EFCAB9-HA and one of each CatSper alpha subunit (1,  
 841 2, 3, or 4). After immunoprecipitation with anti-HA or anti-V5 resin, precipitates were analyzed by  
 842 immunoblotting with antibodies against each CatSper protein to detect the interaction to  
 843 EFCAB9-CatSper $\zeta$  complex. (B) Co-immunoprecipitation assays were performed with each  
 844 accessory ( $\beta$ ,  $\gamma$ ,  $\delta$ , or  $\epsilon$ ) subunit with EFCAB9-CatSper $\zeta$  complex. Reciprocal interaction was  
 845 analyzed by antibodies against each protein. (C) Conservation of CatSper $\zeta$ , EFCAB9, and N-  
 846 and C-terminal domains of CatSper1 amino acid sequences among mammals based on a  
 847 pairwise-distance analysis. The color scheme in heat maps represents the levels of sequence  
 848 variation scored by pairwise distance between two orthologues. The value of pairwise distance  
 849 over 1 was set to 1 (red). (D) CatSper nanodomain organization in wt and EFCAB9 and/or  
 850 CatSper $\zeta$  deficient sperm. (E) Model for CatSper channel activation by EFCAB9-CatSper $\zeta$  binary  
 851 complex. pH<sub>i</sub> elevation during capacitation partially dissociates EFCAB9 from CatSper $\zeta$ , which  
 852 releases gate inhibition and opens the pore, enabling EFCAB9 to bind entering Ca<sup>2+</sup> and  
 853 undergo a conformational change to maintain the prolonged open state of the channel. See also  
 854 [Figure S6](#).

855 **EXPERIMENTAL MODEL AND SUBJECT DETAILS**

856

857 **Animals**

858 *CatSper1*, *d*, and *z*-null mice generated in the previous studies (Chung et al., 2017; Chung et al.,  
859 2011; Ren et al., 2001) are maintained on a C57/BL6 background. Four week old B6D2F1  
860 females for *in vitro* fertilization (IVF) and 7 week old wt male and female C57BL/6 mice for  
861 breeding were purchased from Charles River laboratories. Mice were treated in accordance with  
862 guidelines approved by the Yale Animal Care and Use Committees and Boston Children's  
863 Hospital (IACUC).

864 **Generation of *EFCAB9*-null mice by CRISPR/Cas9 and genotyping of mutation**

865 *Efcab9*-null mice were generated on a C57BL/6 background using CRISPR/Cas9 system.  
866 Female mice were superovulated and mated with males to obtain fertilized eggs. pX330 plasmid  
867 expressing guide RNA (5'-CCGCCATGAACTGACTCCGGGG-3') targeting the first exon of  
868 mouse *Efcab9* was injected into the pronuclei of the fertilized eggs. The developing 2-cell  
869 embryos were transplanted into pseudopregnant females. The target region was PCR amplified  
870 from alkaline-lysed tail biopsies from founders, and the resulting PCR fragments were subjected  
871 to surveyor analysis to examine CRISPR/Cas9 edited indels on the *Efcab9* locus. Mono-allelic  
872 founders with 5bp or 28bp deletion in the first exon were backcrossed with wt C57/BL6 animals  
873 to test germline transmission of the mutant alleles. After the mutant *Efcab9* lines were  
874 established, genotyping was performed by multiplex qPCR (*Efcab9*, forward: 5'-  
875 GAAAGCTGCCGCCATGAA-3', reverse: 5'-ACAGTAAGCAGTAGTTTTGTCCAT-3', and Probe:  
876 5'-(HEX)-CACAGAAAACACCCCGGAGTCAGT-3'; Internal control (IC), forward: 5'-  
877 CACGTGGGCTCCAGCATT-3', reverse: 5'-TCACCAGTCATTTCTGCCTTTG-3', and Probe: 5'-  
878 (TEX615)-CCAATGGTTCGGGCACTGCTCAA-3', BioRad). Potential off-target regions were  
879 selected from E-CRISP. Genomic DNA from wt and *Efcab9*-null mice was extracted. Genomic  
880 region containing expected off-target sites were amplified and PCR products were sequenced.

881 **Generation of *Efcab9*;*CatSperz*-null mice**

882 *Efcab9*<sup>-/-</sup>;*CatSperz*<sup>-/-</sup> double knockout mice were generated by mating *Efcab9*<sup>+/-</sup> males and  
883 *CatSperz*<sup>-/-</sup> females. Double knockout mice were obtained by mating between double  
884 heterozygous (*Efcab9*<sup>+/-</sup>;*CatSperz*<sup>+/-</sup>) males and females. Genotyping was performed by  
885 multiplex qPCR (*CatSperz*, forward: 5'-GCCCATCTACACCAACGTAACC-3', reverse: 5'-  
886 AGTAACAACCCGTCGGATTCTC-3', and Probe: 5'-(Cy5.5)-CGGTCAATCCGCCGTTTGTTC-3';  
887 *Efcab9* and IC primers information as stated for *Efcab9*, BioRad).

888

889 **Cell Lines**

890 **Mammalian cell lines**

891 HEK293T cells (ATTC) were cultured in DMEM (Gibco) containing 10% FBS (Thermofisher) and  
892 1x Pen/Strep (Gibco) at 37 °C, 5% CO<sub>2</sub> condition. HEK cells stably expressing human *CatSper1*  
893 tagged with GFP at C-terminus (HEK-h*CatSper1*-GFP, a kind gift from David Clapham,  
894 Janelia/HHMI) were cultured in 1:1 mixture of DMEM and Ham F12 (DMEM/F12) supplemented  
895 with 10% FBS, 1x Pen/Strep, and 500 µg/ml concentration of geneticin (G418) (Gibco).

896 **Bacterial strains**

897 NEB10β (NEB) and BL21-CodonPlus(DE3)-RIL (Agilent Technologies) bacterial strains were  
898 used for the molecular cloning and recombinant protein expression, respectively. To express  
899 recombinant proteins, freshly formed colonies were picked and inoculated to Luria broth (Sigma-  
900 Aldrich) supplemented with 50 µg/ml of chloramphenicol (AmericanBio Inc) and 100 µg/ml of  
901 ampicillin (AmericanBio Inc) or 50 µg/ml of kanamycin (AmericanBio Inc) depending on the  
902 antibiotic-resistant genes encoded by transformed plasmids. After overnight culture at 37 °C,

903 saturated cultivates were inoculated to terrific broth without antibiotics in one to fiftieth ratio (v/v).  
904 Protein expression was induced by Isopropyl-1-thio- $\beta$ -D-galactopyranoside (IPTG) (AmericanBio  
905 Inc) when absorbance value of the culture (OD<sub>600</sub>) reached 0.5 - 0.7. After IPTG induction, cells  
906 were cultured at 16 °C for 14 - 16hr and harvested to extract recombinant proteins.

907  
908 **Mouse Sperm Preparation and *In Vitro* Capacitation**  
909 Epididymal spermatozoa were collected by swim-out from caudal epididymis in M2 medium  
910 (EMD Millipore). Collected sperm were incubated in human tubular fluid (HTF) medium (EMD  
911 Millipore) at  $2 \times 10^6$  cells/ml concentration to induce capacitation at 37 °C, 5% CO<sub>2</sub> condition for  
912 90 min.

913  
914 **Human Sperm Preparation**  
915 Frozen vials of human sperm from healthy, normal donors were purchased (Fairfax Cryobank).  
916 Vials were thawed and mixed with pre-warmed HEPES-buffered saline (HS) (Chung et al., 2017),  
917 followed by washing in HS two times. Washed sperm were placed on top of 20% Percoll (Sigma  
918 Aldrich) in HS and incubated at 37 °C for 30 minutes to allow for motile sperm to swim-into the  
919 Percoll layer. After removing the top layer containing immotile fraction, sperm cells with high  
920 motility were collected by centrifugation at 2,000 x g and resuspended in HS.

## 921 922 **METHOD DETAILS**

923  
924 **Antibodies and Reagents**  
925 Rabbit polyclonal antibodies specific to mouse CatSper1 (Ren et al., 2001), 2 (Quill et al., 2001),  
926 3, 4 (Qi et al., 2007),  $\beta$ ,  $\delta$  (Chung et al., 2011), and  $\zeta$  (Chung et al., 2017) were described  
927 previously. To produce EFCAB9 antibody recognizing both mouse and human EFCAB9, peptide  
928 corresponding to mouse EFCAB9 (137-154, KKQELRDLFHDITGDR) was synthesized and  
929 conjugated to KLH carrier protein (Open Biosystems). Antisera from the immunized rabbits were  
930 affinity-purified using the peptide immobilized Amino Link Plus resin (Pierce). All the other  
931 antibodies and reagents used in this study are commercially available and listed in the key  
932 resource table. All the chemicals were from Sigma Aldrich unless indicated.

933  
934 **Proteomics Analysis**  
935 Whole sperm proteome analysis from wt and *CatSper1*-null mice was performed concomitantly  
936 with the previous phosphotyrosine proteome analysis (Chung et al., 2014). In short, sperm cells  
937 from wt and *CatSper1*-null mice (N=3 per each group) incubated under capacitating conditions  
938 were lysed with urea in triplicate. The lysates were reduced, alkylated, trypsin-digested, and  
939 reverse-phase purified (Villén and Gygi, 2008). Digested peptides were labeled with TMT to  
940 quantify the protein from wt and *CatSper1*-null sperm. The labeled peptides were subjected to  
941 mass spectrometric analysis using an Orbitrap Fusion mass spectrometer (Thermo Scientific)  
942 with an MS<sup>3</sup> method. Tandem mass spectrometry (MS/MS) spectra was matched to peptide  
943 using Sequest search engine (Thermo Scientific). Peptides having a total of the TMT reporter ion  
944 signal/noise  $\geq 65$  were quantified. False discovery rate was controlled to 1% at the peptide and  
945 protein level.

946  
947 **Open Database Search**  
948 *Transcriptome database*  
949 Gene expression data of *Efcab9*, *Als2cr11*, *Slco6c1*, *Trim69*, and *Fancm* in mouse tissues were  
950 obtained from Mouse ENCODE transcriptome data (Yue et al., 2014) as curated in NCBI Gene  
951 database.

952 **Genome database**

953 Orthologues of CatSper subunits, EFCAB9, ALS2CR11, SLCO6C1, and TRIM69 proteins in 21  
954 eukaryotes were searched in NCBI gene database or by sequence homology analysis as  
955 previously described (Chung et al., 2017). Orthologues not annotated in NCBI gene database  
956 were identified by comparing amino acid sequences of human orthologue using BlastP in NCBI  
957 (<http://blat.ncbi.nlm.nih.gov>) or JGI genome portal (<http://genome.jgi.doe.gov>) with default option.  
958 Resulting hits with expected values  $<10^{-10}$  from Blast alignment were considered as orthologues  
959 of the query proteins.

960  
961 **Multiple Tissue RT-PCR**

962 PCR was carried out using a commercial multiple cDNA panel (MTC, Clontech). Primer pairs  
963 amplifying *Efcab9* (forward: 5'-GAAACGTGAAAGCCTTGATGG-3' and reverse: 5'-  
964 ATCCCGATCTGTGACTTGTTTC-3'), *Efcab1* (forward: 5'-GGACAGAGTATTTTCGAGGCTTT-3'  
965 and reverse: 5'-GCCATCACCATTTCAGATCAAAC-3'), and *Calm1* (forward: 5'-  
966 CAACGAAGTGGATGCTGATG-3' and reverse: 5'-GCACTGATGTAACCATTCCCA-3') mRNA  
967 were used to examine tissue expression of each gene. *Gapdh* (forward: 5'-  
968 TGAAGGTCGGTGTGAACGGATTTGGC-3' and reverse: 5'-ATGTAGGCCATGAGGTCCACCAC-  
969 3') was used for a control.

970  
971 **RNA Extraction, cDNA Synthesis, and Real-Time PCR**

972 Total RNA was extracted from testes of 7, 14, 21, 23, 49, and 80 days old wt males using  
973 RNeasy mini-kit (Qiagen). 500 ng of RNA was used to synthesize cDNAs using iScript cDNA  
974 Synthesis (BioRad). cDNAs were used for real-time PCR (CFX96, Biorad) using the primer pairs:  
975 *CatSper1* (forward: 5'-CTGCCTCTTCCTCTTCTCTG-3' and reverse: 5'-  
976 TGTCTATGTAGATGAGGGACCA-3'), *CatSperz* (forward: 5'-GAGACCTCCTTAGCATCGTC-3'  
977 and reverse: 5'-TCGTGGACCTATATGTGATGAG-3'), and *18srRNA* (forward: 5'-  
978 CGTCTGCCCTATCAACTTTC-3' and reverse: 5'-GTTTCTCAGGCTCCCTCTCC-3'). Primers  
979 described in *Multiple Tissue Expression* were used to amplify *Efcab9*, *Efcab1*, and *Calm1* mRNA.  
980 *18srRNA* was used as a reference gene to normalize quantitative expression by ddCt method.  
981 Three sets of experiments were conducted independently.

982  
983 **Molecular cloning**

984 **Mammalian cell expression constructs**

985 Mouse *Efcab9* ORF clone (Dharmacon, clone 6771929) was subcloned into pHCMV3 (*phCMV3-  
986 mEfcab9*) to express mouse EFCAB9 tagged with HA at C-terminus. Mouse *CatSperz* (*pCAG-  
987 mCatSperz-V5*) (Chung et al., 2017) and *Efcab9* were subcloned into pHCMV3 together for bi-  
988 cystronic expression (*phCMV3-mCatSperz-V5-p2A-mEfcab9*). Human *Efcab9* ORF (GenScript,  
989 #ohu00121d) and *CatSperz* (Chung et al., 2017) were also subcloned into pcDNA3.1 for bi-  
990 cystronic expression (*pcDNA3.1(-)-hEfcab9-HA-p2A-hCatSperz-MYC*). Mouse *CatSper1*, 2, 3,  
991 and 4 (Chung et al., 2014) were subcloned into pHCMV3 to express C-terminal Flag-tagged  
992 proteins (*phCMV3-mCatSper1, 2, 3, or 4-Flag*). Two ORF clones of human *CatSper* variants  
993 (Dharmacon, clone 5269307 and 4823002) were assembled using NEBuilder® HiFi DNA  
994 Assembly (NEB) and cloned into pHCMV3 (*phCMV3-Flag-hCatSper*) for the expression  
995 construct of human *CatSper* CDS (NM\_001130957.1). Human *CatSper* ORF was subcloned  
996 into pHCMV3 (*phCMV3-Flag-hCatSper*). Both human *CatSper* and *CatSperg* constructs were  
997 tagged with Flag at the N-termini. For Flag-tagged CatSper constructs in pHCMV3 vector, a stop  
998 codon was placed at the upstream of HA sequences.

999 **Bacterial expression constructs**

1000 For N-terminal GST-tagged EFCAB9 and 6xHis-tagged CatSper $\zeta$  expression in bacteria, mouse

1001 *Efcab9* and *CatSperz* cDNAs were subcloned into pGEX-6P2 (*pGEX-6P2-mEfcab9*) or  
1002 pET43.1a(+) (*pET43.1a(+)-mEFCAB9*), and pET32a(+) (*pET32a(+)-gb1-mCatSperz*),  
1003 respectively. To generate constructs expressing EFCAB9 with two (EFCAB9<sup>Mut2</sup>, D72N/E160Q)  
1004 and four (EFCAB9<sup>4Mut</sup>, D72N/D82N and D149N/E160Q) amino acid mutations on EF-hand loops,  
1005 sited-directed mutagenized *Efcab9* cDNAs were subcloned into pGEX-6P2 (*pGex-6P2-*  
1006 *mEfcab9*<sup>2Mut</sup> and *pGex-6P2-mEfcab9*<sup>4Mut</sup>, respectively) using NEBuilder® HiFi DNA Assembly.  
1007 The construct to express GST-fused N-terminal intracellular domain of *CatSper1* (1-150, *pGEX-*  
1008 *2T-mCatSper1-N150*) was a kind gift from D.E. Clapham, Janelia/HHMI. For expression of C-  
1009 terminal intracellular domain of *CatSper1*, *pET32a(+)-mCatSper1-C-Flag* was constructed by  
1010 amplifying a fragment of *CatSper1* cDNA encoding amino acids 574-686 tagged with Flag at C-  
1011 terminus.

1012  
1013 **Recombinant protein expression in mammalian cells**  
1014 HEK 293T cells were transiently transfected with plasmids encoding various *CatSper* subunits in  
1015 combination: the pore-forming (mouse *CatSper1*, 2, 3, and 4) or the auxiliary (mouse *CatSperβ*,  
1016  $\delta$ ,  $\zeta$ , EFCAB9, human *CatSperγ*,  $\epsilon$ , EFCAB9, or mouse and human *CatSperζ* and EFCAB9 bi-  
1017 cistronically) subunits. HEK cells stably expressing GFP-tagged human *CatSper1* at C-terminus  
1018 were transfected with a plasmid encoding human *CatSperζ* and human EFCAB9 bi-cistronically.  
1019 Lipofectamin 2000 (Invitrogen) or polyethylimine (PEI) reagent were used for transfection  
1020 following the manufacturer's instruction. Transfected cells were used to characterize antibodies  
1021 or co-immunoprecipitation (co-IP) experiments.

1022  
1023 **Protein Extraction, Immunoprecipitation, and Western blotting**  
1024 Mouse and human sperm protein was extracted as previously described (Chung et al., 2017;  
1025 Chung et al., 2011; Chung et al., 2014). Transfected HEK293T cells and HEK cells expressing  
1026 GFP-tagged human *CatSper1* were lysed with 1% Triton X-100 in PBS containing EDTA-free  
1027 protease inhibitor cocktail (Roche) by rocking at 4 °C for 1 hr, and centrifuged at 14,000 x g for  
1028 30 minutes at 4 °C. Solubilized proteins in the supernatant were mixed with Protein A/G-  
1029 magnetic beads conjugated with either 1 μg each of rabbit polyclonal antibodies (GFP (FL,  
1030 SantaCruz), mouse *CatSper1*, mouse *CatSperδ*, mouse *CatSperζ*, human *CatSperζ*) or mouse  
1031 monoclonal antibodies (Flag (clone M2, Sigma-Aldrich), MYC (9E10, SantaCruz), HA magnetic  
1032 beads (clone 2-2.2.14, Pierce)) or V5 agarose (clone V5-10, Sigma-Aldrich). The immune  
1033 complexes were incubated at 4 °C overnight and co-IP products were eluted with 60 μl of 2x  
1034 LDS sampling buffer supplemented with 50 μM dithiothreitol (DTT) and denatured at 75 °C for 10  
1035 minutes. Primary antibodies used for the western blotting were: rabbit polyclonal anti-mouse  
1036 *CatSper1*, *CatSper2*, *CatSper3*, *CatSper4*, *CatSperβ*, *CatSperδ*, EFCAB9, human *CatSperζ*,  
1037 GFP (FL, SantaCruz), CaM, (05-173, Upstate), phosphotyrosine (clone 4G10, EMD Millipore) at  
1038 1 μg/ml, mouse *CatSperζ* (2.7 μg/ml), mouse monoclonal anti-HA (clone 2-2.2.14, Pierce), Flag  
1039 (clone M2, Sigma-Aldrich) at 0.5 μg/ml, acetylated tubulin (T7451, Sigma Aldrich, 1:20,000),  
1040 HRP-conjugated V5 (clone E10/V4RR, ThermoFisher, 1:2,000), HA (clone 6E2, CST, 1:1,000),  
1041 and MYC (Clone 9B11, CST, 1:1,000). For secondary antibodies, anti-mouse IgG-HRP, anti-  
1042 rabbit IgG-HRP (Jackson ImmunoResearch, 1:10,000) and mouse IgG Trueblot (clone eB144,  
1043 Rockland, 1:1,000) were used.

1044  
1045 **Sperm Immunocytochemistry**  
1046 Mouse and human sperm were washed in PBS twice, attached on the glass coverslips, and fixed  
1047 with 4% paraformaldehyde (PFA) in PBS at room temperature (RT) for 10 minutes (mouse) or at  
1048 4 °C for 1 hr (human). Fixed samples were permeabilized using 0.1% Triton X-100 in PBS at RT

1049 for 10 minutes, washed in PBS, and blocked with 10% goat serum in PBS at RT for 1 hr. Cells  
1050 were stained with anti-mouse EFCAB9 (20  $\mu\text{g/ml}$ ), CatSper1 (10  $\mu\text{g/ml}$ ), or CatSper $\zeta$  (20  $\mu\text{g/ml}$ )  
1051 in PBS supplemented with 10% goat serum at 4 °C overnight. After washing in PBS, the samples  
1052 were incubated with goat anti-rabbit Alexa647 or Alexa555-plus (Invitrogen, 1:1,000) in 10% goat  
1053 serum in PBS at RT for 1 hr. Immunostained samples were mounted with Prolong gold  
1054 (Invitrogen) and cured for 24 hr, followed by imaging with Zeiss LSM710 Elyra P1 using Plan-  
1055 APOchromat 63X/1.40 and alpha Plan-APO 100X/1.46 oil objective lens (Carl Zeiss). Hoechst  
1056 dye was used to counterstain nucleus for sperm head.  
1057

### 1058 **Super-Resolution Imaging**

#### 1059 *Structured illumination microscopy (SIM)*

1060 Structured illumination microscopy (SIM) imaging was performed with Zeiss LSM710 Elyra P1  
1061 using alpha Plan-APO 100X/1.46 oil objective lens. Samples were prepared as described in  
1062 *Sperm Immunocytochemistry* with a minor modification in that the immunostained sperm  
1063 coverslips were mounted with VectaShield (Vector laboratory). 2D SIM images were taken using  
1064 a laser at 642 nm (150 mW) for Alexa647 (Invitrogen). The images were acquired using 5 grid  
1065 rotations with a 51 nm SIM grating period. For 3D SIM images, a laser at 561nm (200 mW) was  
1066 used for Alexa 555-plus (Invitrogen). Z-stack was acquired from 42 optical sections with a 100  
1067 nm interval. Each section was imaged using 5 rotations with a 51 nm grating period. Both 2D  
1068 and 3D SIM Images were rendered using Zen 2012 SP2 software.  
1069

#### 1070 *4Pi Single-Molecule Switching Nanoscopy (4Pi-SMSN)*

1071 Mouse sperm were attached onto the center of 25-mm diameter of glass cover slips. The  
1072 samples were prepared as described in *Sperm immunocytochemistry* with Alexa647-conjugated  
1073 2<sup>nd</sup> antibody. The samples were imaged with a custom-built 4Pi Single-Molecule Switching  
1074 Nanoscopy (4Pi-SMSN) system as previously described (Huang et al., 2016) with minor  
1075 modifications. Briefly, the fluorescent signal was collected coherently by two opposing objectives  
1076 (100 x/1.35NA, silicone oil immersion, Olympus) and imaged on a sCMOS camera (ORCA-Flash  
1077 4.0v2, Hamamatsu). The microscope was equipped with an excitation laser at 642 nm (MPB  
1078 Communications, 2RU-VFL-2000-642-B1R) and an activation laser at 405 nm (Coherent OBIS  
1079 405 LX, 50 mW). All data were acquired at 100 fps at a 642 nm laser intensity of about 7.5  
1080 kW/cm<sup>2</sup>. The full system design and the image analysis algorithms were previously described in  
1081 detail (Huang et al., 2016). The 4Pi movies were rendered using Vutara SRX software (Bruker).  
1082 Angular profiling was carried out as previously reported (Chung et al., 2014).  
1083

### 1084 **Scanning Electron Microscopy**

1085 Sperm from wt, *CatSper1-null*, and *Efcab9-null* males were washed in PBS and attached on the  
1086 glass coverslips. The coverslips were fixed with 4% paraformaldehyde in PBS for 10 minutes at  
1087 RT, and washed in PBS twice. The coverslips were incubated with 2.5% glutaraldehyde in 0.1M  
1088 sodium cacodylate buffer pH7.4 for another hour at 4 °C. Samples were then rinsed, post fixed in  
1089 2% osmium tetroxide in 0.1M sodium cacodylate buffer pH 7.4, and dehydrated through a series  
1090 of ethanol to 100%. The samples were dried using a Leica 300 critical point dryer with liquid  
1091 carbon dioxide as transitional fluid. The coverslips were glued to aluminum stubs, and sputter  
1092 coated with 5 nm platinum using a Cressington 208HR (Ted Pella) rotary sputter coater.  
1093

### 1094 **Mating Test and *In Vitro* Fertilization**

1095 Female mice were caged with heterozygous or homozygous *Efcab9*-mutant or *Efcab9*; *CatSperz*  
1096 double mutant males for two months to record pregnancy and litter size when gave births. For  
1097 IVF, 5 -7 weeks B6D2F1 female mice were superovulated by injecting progesterone and anti-

1098 inhibin serum (Central Research Co, Ltd) (Hasegawa et al., 2016), and the oocytes were  
1099 collected after injecting 13 hr from 5 U of human chorionic gonadotrophin (EMD millipore).  
1100 Prepared epididymal sperm were capacitated at 37 °C for 90 min, and inseminated to oocytes  
1101 with 2 x 10<sup>5</sup> cells/ml concentration. After 5 hr co-incubation, oocytes were washed and  
1102 transferred to fresh HTF medium, and cultured overnight at 37 °C under 5% CO<sub>2</sub>. 2-cell embryos  
1103 were counted 20-22 h after insemination as successful fertilization.  
1104

### 1105 **Flagella Waveform Analysis**

1106 To tether sperm head for planar beating, non-capacitated or capacitated spermatozoa (2 x 10<sup>5</sup>  
1107 cells) were transferred to the fibronectin-coated 37 °C chamber for Delta T culture dish controller  
1108 (Bioptechs) filled with HEPES-buffered HTF medium (H-HTF) (Chung et al., 2017) for 1 minute.  
1109 Flagellar movements of the tethered sperm were recorded for 2 sec with 200 fps using pco.edge  
1110 sCMOS camera equipped in Axio observer Z1 microscope (Carl Zeiss). All movies were taken at  
1111 37 °C within 10 minutes after transferring sperm to the imaging dish. FIJI software (Schindelin et  
1112 al., 2012) was used to measure beating frequency and  $\alpha$ -angle of sperm tail, and to generate  
1113 overlaid images to trace waveform of sperm flagella as previously described (Chung et al., 2017).  
1114

### 1115 **Recombinant Protein Purification**

1116 Each Construct expressing GST-tagged EFCAB9, EFCAB9<sup>2Mut</sup>, EFCAB9<sup>4Mut</sup>, and N-terminus of  
1117 CatSper1 (CatSper-N150) and 6xHis-tagged CatSper $\zeta$  and C-terminus of CatSper1 (CatSper1-C)  
1118 was transformed to BL21-CodonPlus(DE3)-RIL competent cells (Agilent Technologies). Fresh  
1119 colonies were inoculated and cultured into LB with antibiotics at 37 °C overnight. Saturated  
1120 cultivates were 50 times diluted in TB medium and cultured further at 37 °C until the OD<sub>600</sub>  
1121 values reach 0.5 - 0.7. To induce protein expression, IPTG (0.2mM for EFCAB9 and CatSper1-  
1122 N150; 0.1 mM for CatSper $\zeta$ ; 0.05 mM for EFCAB9<sup>2Mut</sup>, EFCAB9<sup>4Mut</sup>, and CatSper1-C) was added  
1123 to the bacteria cultures and incubated further for 16 hr at 16 °C. When the CatSper1-N150  
1124 recombinant protein expression is induced by IPTG, proteasome inhibitor MG-132 (Calbiochem)  
1125 was added to 10  $\mu$ M. Cultured cells were harvested and washed with cold PBS. Cell pellets were  
1126 resuspended in buffers containing 10 mM HEPES in pH 8.0 (EFCAB9, EFCAB9<sup>2Mut</sup>, and  
1127 EFCAB9<sup>4Mut</sup>), pH 7.5 (CatSper1-N150 and CatSper1-C) or pH6.0 (CatSper $\zeta$ ) with 135 mM NaCl  
1128 containing EDTA-free protease inhibitor cocktail (Roche). MG-132 was also added to 30  $\mu$ M in  
1129 the resuspension buffer for CatSper1-N150 recombinant protein purification. Resuspended cells  
1130 were lysed using EmulsiFlex-C3 (AVESTIN, Inc.) or VCX500 sonicator (SONICS). Lysates were  
1131 centrifuged at 14,000 x g for 1 hr at 4 °C. The supernatant were incubated with glutathione  
1132 agarose (Pierce) or HisPur Ni-NTA resin (Pierce) depending on the tag of the target recombinant  
1133 proteins for 1 hr at RT. Glutathione agarose was washed with 10 mM HEPES buffer pH7.5, 140  
1134 mM NaCl and the GST-fused protein was eluted in the elution buffer (50 mM HEPES buffer  
1135 pH7.4 with 10 mM reduced glutathione). Ni-NTA resin was washed with 10 mM HEPES buffer  
1136 pH6.5, 300 mM NaCl with 30 mM (CatSper1-C) or 100 mM (CatSper $\zeta$ ) Imidazole and the His-  
1137 tagged proteins were eluted with the buffer containing 10 mM HEPES buffer pH7.4, 135 mM  
1138 NaCl, 300 mM Imidazole. The eluents were dialyzed at 4 °C against storage buffer (10mM  
1139 HEPES buffer pH7.4, 135mM NaCl in 50% glycerol). To express and purify recombinant  
1140 EFCAB9 and CatSper $\zeta$  proteins together, competent cells were transformed by *pET43.1a(+)-*  
1141 *mEfcab9* and *pET32a(+)-mCatSperz* together. A fresh colony was picked, and cultured as  
1142 described above. To induce the protein expression, the cells were treated with 0.05 mM IPTG  
1143 and harvested after 14 hr culture at 16 °C. After washing in PBS, the pellet was resuspended in  
1144 10 mM HEPES buffer pH7.5, 150 mM NaCl, and lysed using EmulsiFlex-C3 (AVESTIN, Inc.).  
1145 Lysates were centrifuged and the collected supernatant was incubated with glutathione agarose.

1146 The agarose was washed with 10 mM HEPES buffer pH7.5, 150 mM NaCl. The bound  
1147 recombinant proteins were eluted from the glutathione agarose with the elution buffer for GST-  
1148 tagged protein, followed by dialysis against the storage buffer as described above.

1149  
1150 **Pull-down Assay**  
1151 Pull-down assay was performed to test direct binding between purified recombinant proteins. 5  
1152  $\mu$ l of glutathione agarose (GST pull-down; Pierce), HisPur Ni-NTA resin (His pull-down; Pierce),  
1153 or 15  $\mu$ l of Protein-A/G agarose beads slurry (SantaCruz) cross-linked with CatSper1 antibody  
1154 was equilibrated with pre-binding buffer (10 mM HEPES pH7.5, 140 mM NaCl), and incubated  
1155 with the recombinant GST-tagged EFCAB9 or 6xHis tagged CatSper $\zeta$ , or GST-CatSper1-N150  
1156 protein (bait proteins), respectively, at 4 °C for overnight. Incubated resin was washed in pre-  
1157 binding buffer three times and equilibrated in the binding buffer in various compositions for each  
1158 experiment. Prey proteins subjected to interact with bait proteins were incubated with the resin  
1159 equilibrated with binding buffer for 1 hr at RT. The resin was washed in the binding buffer for  
1160 each group four times. Resin was collected and the bound proteins were eluted with 2X LDS  
1161 sampling buffer supplemented with 50 mM DTT, and denatured at 75 °C for 10 minutes. Protein  
1162 interaction was confirmed by Coomassie blue staining (GelCode™ Blue Safe Protein Satin,  
1163 ThermoFisher) or western blotting. Detailed experiment procedures and compositions of binding  
1164 buffers for each experiment are as described below.

1165 *Interaction between EFCAB9 and CatSper $\zeta$* : Recombinant EFCAB9 and CatSper $\zeta$  proteins were  
1166 used as bait for glutathione agarose or His-Pur Ni-NTA resin, respectively to test their interaction  
1167 reciprocally. In His-pull down assay, pre-binding buffer contains 30 mM Imidazole. Each pre-  
1168 binding buffer used in GST or His pull-down assay was also used as binding buffer.

1169 *Ca<sup>2+</sup>- or pH-dependent interaction between EFCAB9 and CatSper $\zeta$* : To examine the Ca<sup>2+</sup>- or  
1170 pH-sensitivity of the interaction, GST pull-down was performed with the recombinant proteins.  
1171 Recombinant EFCAB9 bound to glutathione resin was equilibrated with binding buffer at pH7.5  
1172 with different Ca<sup>2+</sup> concentration by adding 2 mM CaCl<sub>2</sub> or 2 mM EGTA or different pH (pH 6.0,  
1173 7.5, and 8.5) with nominal 0 Ca<sup>2+</sup> concentration (no added Ca<sup>2+</sup>). Calcium and pH-dependent  
1174 interaction within mutated EFCAB9 and CatSper $\zeta$  recombinant proteins was performed with the  
1175 same buffers.

1176 *Interaction between EFCAB9-CatSper $\zeta$  complex and CatSper1 intracellular domains*: Co-purified  
1177 EFCAB9-CatSper $\zeta$  recombinant proteins were subjected to interact with either N- or C- terminal  
1178 domain of CatSper1 protein purified as described. Direct interaction of N-terminal domain  
1179 (CatSper1-N150) with CatSper $\zeta$  or EFCAB9-CatSper $\zeta$  complex was tested by pulling down  
1180 CatSper1-N150 with glutathione agarose or CatSper1-crosslinked A/G agarose slurry beads.  
1181 GST pull-down was performed to test the interaction between EFCAB9-CatSper $\zeta$  complex and  
1182 CatSper1-C.

1183  
1184 **Sequence comparison of orthologs**  
1185 Protein sequences of EFCAB9, CatSper $\zeta$ , and intracellular domains of CatSper1, 2, 3, 4 and  
1186 Ca<sub>v</sub>3.1 over 100 amino-acid residues were collected from 12 mammals, mouse (*Mus musculus*),  
1187 rat (*Rattus norvegicus*), hamster (*Cricetulus griseus*), squirrel (*Ictidomys tridecemlineatus*),  
1188 human (*Homo sapiens*), chimpanzee (*Pan troglodytes*), baboon (*Papio anubis*), pig (*Sus scrofa*),  
1189 cow (*Bos taurus*), dog (*Canis lupus familiaris*), cat (*Felis catus*), and ferret (*Mustela putorius*  
1190 *furo*). Orthologue sequences were aligned by MUSCLE alignment algorithm with default option  
1191 (Edgar, 2004), and pairwise distances between orthologues were calculated. Pairwise distances  
1192 were represented to heatmaps indicating sequence diversity among mammals. Co-evolution  
1193 between two orthologues was modeled by plotting the pairwise distances of the orthologues



1194 between two species. Correlation coefficient of the plot is considered as co-evolution score, and  
1195 the slope value of the linear-regression model indicates relative evolutionary rate within  
1196 orthologues.

1197  
1198 **Electrophysiology**

1199 Sperm cells were allowed to adhere to glass coverslips. Gigaohm seals were formed at the  
1200 cytoplasmic droplet of motile sperm cells in standard HEPES saline buffer containing (in mM):  
1201 130 NaCl, 20 HEPES, 10 lactic acid, 5 glucose, 5 KCl, 2 CaCl<sub>2</sub>, 1 MgSO<sub>4</sub>, 1 sodium pyruvate,  
1202 pH 7.4 adjusted with NaOH, 320 mOsm/L (Lishko et al., 2010; Lishko et al., 2011). Transition into  
1203 whole-cell mode was achieved by applying voltage pulses (400-620 mV, 1 ms) and simultaneous  
1204 suction. Data were sampled at 10 Hz and filtered at 1 kHz and cells were stimulated every 5  
1205 seconds. The divalent-free bath solution (DVF, ~320 mOsm/L) consisted of (in mM): 140  
1206 CsMeSO<sub>3</sub>, 40 HEPES, 1 EDTA and pH 7.4 was adjusted with CsOH. pH-dependent  $I_{CatSper}$  from  
1207 wt and *CatSperz*-null sperm recorded with pipette solution (~335 mOsm/L) contained (in mM):  
1208 130 CsMeSO<sub>3</sub>, 60 MES, 3 EGTA, 2 EDTA, 0.5 Tris-HCl. Access resistance was 43-62 MΩ. To  
1209 induce intracellular alkalization (pH<sub>i</sub> = ~7.4), 10 mM NH<sub>4</sub>Cl were added to the bath solution. For  
1210 experiments with defined intracellular pH and 0 μM or 10 μM Ca<sup>2+</sup>, inside pipette solution  
1211 containing (in mM):130 CsMeSO<sub>3</sub>, 60 MES (pH = 6.0) or HEPES (pH = 7.4), 5 EGTA, 4 CsCl,  
1212 and 2 EDTA (0 μM Ca<sup>2+</sup>) or 130 mM CsMeSO<sub>3</sub>, 65 MES (pH = 6.0) or 60 HEPES (pH = 7.4), 4  
1213 CsCl and 2 HEDTA (10 μM Ca<sup>2+</sup>). Required CaCl<sub>2</sub> concentrations for desired free Ca<sup>2+</sup>  
1214 concentration were calculated with WinMAXC32 version 2.51 (Chris Patton, Stanford University).  
1215 Access resistance was 42-61 MΩ. pH of pipette solution was adjusted with CsOH. All  
1216 experiments were performed at 22 °C. Data were analyzed with Clampfit (v10.3, pClamp) and  
1217 OriginPro (v9.0, Originlab).

1218  
1219 **QUANTIFICATION AND STATISTICAL ANALYSIS**

1220 Statistical analyses were performed using Student's t-test. Differences were considered  
1221 significant at \* $P < 0.05$ , \*\* $P < 0.01$ , and \*\*\* $P < 0.001$ . Pairwise distances between orthologues were  
1222 calculated using MEGA6 software (Tamura et al., 2013). Correlation coefficient and linear-  
1223 regression model in orthologue sequence comparison were calculated using R software.

1224  
1225 **DATA AND SOFTWARE AVAILABILITY**

1226 The original dataset is available at doi:10.17632/mv52ykks6x.1

1227
